1 **Behavior-specific occupancy patterns of Pinyon Jays (*Gymnorhinus***  
2 ***cyanocephalus*) in three Great Basin study areas and significance for**  
3 **pinyon-juniper woodland management**

4  
5 (Short Title): Behavior-specific Pinyon Jay occupancy patterns

6  
7 John D. Boone<sup>1\*</sup>, Chris Witt<sup>2</sup>, and Elisabeth M. Ammon<sup>1</sup>

8  
9 <sup>1</sup>Great Basin Bird Observatory, Reno, Nevada, United States of America

10 <sup>2</sup>U.S. Forest Service Rocky Mountain Research Station, Boise, Idaho, United States of America

11  
12 \*Corresponding author. E-mail [boone@gbbo.org](mailto:boone@gbbo.org)

## 13 **Abstract (Level 1 heading)**

14 The Pinyon Jay is a highly-social, year-round inhabitant of pinyon-juniper woodlands in the  
15 western United States. Range-wide, Pinyon Jays have declined ~ 3 – 4% per year for at least the  
16 last half-century. At the same time, large acreages of pinyon-juniper woodland have been  
17 removed or thinned to improve habitat for Greater Sage-Grouse or other game species across  
18 much of the Great Basin, which is home to nearly half of the global population of Pinyon Jays.  
19 Occupancy patterns and habitat use of Pinyon Jays have not been well characterized across much  
20 of the species' range, and obtaining this information is necessary for better understanding the  
21 causes of ongoing declines and determining useful conservation strategies. Our goal of this study  
22 was to identify the characteristics of areas used by Pinyon Jays for several critical life history  
23 components and to thereby facilitate the inclusion of Pinyon Jay conservation measures in the  
24 design of vegetation management projects. To accomplish this, we studied Pinyon Jays in three  
25 widely separated study areas using radio telemetry and direct observation, and measured key  
26 attributes of their locations and a separate set of randomly-selected control sites using the U. S.  
27 Forest Service's Forest Inventory Analysis protocol. Data visualizations, non-metric dimension  
28 scaling ordinations, and logistic regressions of the resulting data indicated that Pinyon Jay  
29 occupancy was concentrated in a distinct subset of available pinyon-juniper woodland habitat,  
30 and further that Pinyon Jays used different habitats, arrayed along elevational and tree-cover  
31 gradients, for seed caching, foraging, and nesting. Caching was concentrated in low-elevation,  
32 relatively flat areas with low tree cover; foraging occurred at slightly higher elevations with  
33 moderate tree cover, and nesting was concentrated in somewhat higher areas with greater tree  
34 cover and higher stand density. All three of these Pinyon Jay behavior types were highly  
35 concentrated within the lower-elevation band of pinyon-juniper woodland close to the woodland-

36 shrubland ecotone. Because woodland removal projects in the Great Basin are often concentrated  
37 in these same areas, it is critical to incorporate conservation measures informed by Pinyon Jay  
38 occupancy patterns into existing woodland management paradigms, protocols, and practices.

39

40

## 41 **Introduction** (level 1 heading)

42

43 The Pinyon Jay (*Gymnorhinus cyanocephalus*) is a highly-social corvid that inhabits pinyon-  
44 juniper and other coniferous woodlands in the interior western U. S. [1-3] (Fig 1). Pinyon Jays  
45 form year-round flocks that can range from a few dozens to several hundred members [3-6].  
46 They are perhaps best known for harvesting and caching the seeds, or “pine nuts”, of the pinyon  
47 pine (primarily *Pinus monophylla* and *P. edulis*) as their primary food source, though they also  
48 consume other conifer seeds and insects [3, 7, 8]. Pinyon Jays are present year-round in parts of  
49 at least ten states, but most of their range lies within Bird Conservation Regions (BCRs) 9  
50 (“Great Basin”) and 16 (“Southern Rockies and California Plateau”) [9], with highest densities in  
51 central-eastern Nevada and western New Mexico (Fig 2). Since North American Breeding Bird  
52 Survey data collection began in 1967, Pinyon Jays have experienced steep and sustained declines  
53 averaging 3-4% per year both range-wide and within most of the states and regions they occupy  
54 [4, 10]. This equates to a loss of about 85% of the population over 50 years, one of the largest  
55 recorded declines among all widely-distributed passerine birds in the interior western United  
56 States [10, 11].

57

58 **Fig 1. Distribution of the Pinyon Jay [4], pinyon pine (*Pinus monophylla* and *P. edulis***  
59 **combined), and juniper (*Juniperus osteosperma*, *J. occidentalis*, and *J. spocolorum***  
60 **combined) [5]. Some of the juniper distribution is invisible under the pinyon pine**  
61 **distribution on the map.**

62  
63 **Fig 2. Relative density of the Pinyon Jay (purple colors, with darker colors representing**  
64 **higher relative densities [4]) and Bird Conservation Regions (BCRs) 9 (Great Basin) and 16**  
65 **(Southern Rockies / Colorado Plateau).**

66  
67 Despite this decline, no systematic conservation efforts have been undertaken for the Pinyon Jay,  
68 although it is included on the ‘sensitive species’ lists of many federal and state management  
69 agencies and avian conservation organizations [12-15], and is the subject of a recent interagency  
70 working group conservation strategy [15]. The lack of conservation action for Pinyon Jays may  
71 be attributable to several factors. First, despite a rich knowledge of the species’ social behavior,  
72 breeding behavior, and spatial memory [6, 16, 17], its occupancy and habitat use patterns are  
73 poorly characterized and understudied in most parts of its range. Second, there are no widely-  
74 accepted or strongly-supported hypotheses about the causes of Pinyon Jay population declines.  
75 Finally, the landscapes inhabited by Pinyon Jays are primarily managed for other priorities.  
76 These include improving habitat for game species such as Greater Sage-Grouse (*Centrocercus*  
77 *urophasianus*) and mule deer (*Odocoileus heminus*), creating wildlife corridors, and mitigating  
78 fire hazards [3, 18-22].

79

80 Pinyon Jay declines could be related, at least in part, to changes in the pinyon-juniper woodlands  
81 that comprise most of their habitat [3, 22-24] and much of the forested landscape of the Great  
82 Basin (i.e., BCR 9) and Colorado Plateau (i.e., BCR 16) [25-28]. The spatial extent of pinyon-  
83 juniper woodlands (most commonly a *Pinus monophylla* - *Juniperus osteosperma* association) in  
84 this region has undergone climate-induced fluctuations since the end of the Pleistocene epoch  
85 11,500 years ago [29, 30], but it has been suggested by some authors that over the last 150 years,  
86 extension of local woodland range (i.e. “expansion”) and increased tree densities within extant  
87 stands (i.e. “infill”) have occurred at atypical and perhaps unprecedented rates, at least in the  
88 Great Basin [22, 31-34]. Other authors have questioned this conclusion and suggest that  
89 expansion and infill are either localized, part of a historically normal pattern of spatio-temporal  
90 woodland dynamics, or represent recoveries from earlier widespread clearing during the western  
91 settlement period [22, 35, 36]. Regardless of which of these paradigms is correct, over recent  
92 decades extensive acreages of pinyon-juniper woodlands have been clear cut or thinned by  
93 resource management agencies and private owners to accomplish various management objectives  
94 [3, 37, 38].

95

96 In the Great Basin, the primary pinyon-juniper woodland management objective over the last 20  
97 years has been creation or restoration of shrubland habitat by clear cutting stands that are  
98 regarded as encroaching into shrublands, often with a goal of benefitting Greater Sage-Grouse  
99 [39, 40]. If and how this type of vegetation management affects Pinyon Jays remains  
100 undetermined. Answering this question requires a better understanding of Pinyon Jay occupancy  
101 patterns and habitat use in the Great Basin, determining the extent of overlap between their  
102 preferred habitats and ongoing vegetation management activities, and monitoring or modeling

103 the effects of those activities. In this study, we compared the habitats used by Pinyon Jays for  
104 caching or retrieving seeds, for foraging, and for nesting, to the full range of habitat available  
105 within pinyon-juniper woodlands. Our goals were to determine whether Pinyon Jays in the Great  
106 Basin used predictable subsets of available habitat for these distinct behavior types. If so, this  
107 information could assist managers seeking to incorporate Pinyon Jay conservation measures into  
108 existing vegetation management programs for pinyon-juniper woodlands, and help to guide  
109 future research [15].

110

111

## 112 **Methods** (level 1 heading)

113

### 114 **Overview of study design and study region** (level 2 heading)

115

116 We used a case-control study design [41, 42], with observed locations of Pinyon Jay flocks as  
117 case records and a set of pre-existing Forest Inventory Analysis (FIA) plots established by the  
118 U.S. Forest Service (USFS) as control sites (see below for details). Pinyon Jay data were  
119 collected from 2008 – 2014 in three Great Basin study areas. The control sites were distributed  
120 over a broader study region located entirely within the Central Basin and Range Ecoregion [43]  
121 and BCR 9 (Fig 2) that encompassed all three Pinyon Jay study areas (Fig 3). Control sites were  
122 not assumed to be unoccupied by Pinyon Jays, but were intended to provide a representative  
123 characterization of the diversity of pinyon-juniper woodland habitat available within the general  
124 study region. Habitat at Pinyon Jay locations and control sites was quantified using the  
125 standardized FIA protocol (see below) within circular 0.405-ha (1-acre) plots, which defined the

126 spatial scale of this analysis. Analyses consisted of ordinations and logistic regressions,  
127 supplemented by data visualizations. We recognize the potential bias inherent in case-control  
128 sampling designs and followed Manly et al.'s [44] and Keating and Cherry's [42] guidance for  
129 analysis.

130

131 **Fig 3. Locations of three Pinyon Jay study areas and FIA plots that served as control sites.**  
132 **FIA plot locations are approximate (i.e. "fuzzed") to comply with USFS data protection**  
133 **policies. FIA plots are color coded to indicate the Pinyon Jay study area with which they**  
134 **were analytically paired.**

135

136 **Pinyon Jay study areas and timeline** (level 2 heading)

137

138 Pinyon Jay locations came from multiple Pinyon Jay flocks in these three study areas (Fig 3):

139 1) Eastern Nevada (~ 63,130-ha study area), specifically the foothills between Baker,  
140 Nevada and Great Basin National Park, and Steptoe Valley south of the town of Ely,  
141 Nevada. This area is mostly comprised of public lands managed by the U.S. Bureau of  
142 Land Management, but includes some private property near Baker. Pinyon Jay data were  
143 collected from 2/28/2008 – 6/26/2008 and from 5/10/2009 – 8/27/2009.

144 2) Southern Idaho (~ 23,470-ha study area), specifically the area in and around City of  
145 Rocks National Reserve and Castle Rocks State Park in Cassia County. This study area  
146 contains the northernmost occurrence of pinyon pine in North America [45]. Jurisdictions  
147 within the study area are the U.S. National Park Service, Idaho State Parks, U.S. Bureau

148 of Land Management, and private lands. Pinyon Jay data were collected from 7/20/2012  
149 – 10/5/2012.

150 3) Central Nevada (~ 89,030-ha study area), specifically the Desatoya Range which lies  
151 along the border between Churchill County on the west and Lander County on east. This  
152 study area is comprised almost exclusively of U.S. Bureau of Land Management lands,  
153 with limited private inholdings. Pinyon Jay data were collected from 3/29/2013 –  
154 6/5/2013.

155  
156 Study area locations and periods of data collection were governed by three different funding  
157 agreements, and therefore seasonality was not standardized across all three areas. All study areas  
158 are characterized by mountainous “basin and range” topography, with plant communities  
159 dominated by big sagebrush (*Artemisia tridentata*) at lower elevations, pinyon-juniper  
160 woodlands at mid-elevations, and various mountain shrub and forest types at high elevations.  
161 Pinyon-juniper woodlands range in elevation from ~ 1,500 m – 2,600 m across all study areas,  
162 and are usually comprised of varying proportions of *P. monophylla* and *J. osteosperma*. Public  
163 lands in all study areas are managed for multiple uses and experience varying levels of livestock  
164 grazing and off-road vehicle travel.

165

## 166 **Pinyon Jay data collection and processing (level 2 heading)**

167

168 Pinyon Jay data collection had several distinct components; initial searches, observational  
169 surveys, capture and radio-tagging, and radio-telemetry surveys. The observational surveys and  
170 radio-telemetry surveys generated the Pinyon Jay locations that are the basis of our analyses.



171  
172 Initial searches of potential Pinyon Jay habitat (defined as pinyon-juniper woodlands and  
173 visually adjacent shrublands) were conducted during the first 1-2 weeks of field work at a given  
174 study area on foot and by vehicle to identify all or most of the Pinyon Jay flocks present.  
175 Because Pinyon Jay flocks are visually apparent from long distances, “noisy” (except when at  
176 the nest), and spatially segregated from one another, we regarded this a feasible goal. Search  
177 patterns used during initial searches were not systematized but were instead tailored to take  
178 advantage of local topography and access points. Areas searched were delineated on imagery  
179 maps to facilitate thorough coverage of pinyon-juniper woodland across a given study area.  
180 Upon detecting a flock, the observer usually maintained contact over a period of 1-3 h on each of  
181 several visits to obtain a preliminary and approximate delineation of the flock’s movement  
182 patterns and primary activity areas.

183  
184 Flocks that were consistently detected during initial searches were then subjected to more  
185 intensive study by observational surveys and/or radio-telemetry surveys to obtain a sample of  
186 occupied locations. Observational surveys involved establishing visual contact with a flock;  
187 observing the flock with binoculars from a distance sufficient to prevent alteration of flock  
188 behavior (typically > 75 m); and recording approximately once per hour the point coordinates of  
189 the estimated centroid of the flock’s location along with estimated flock size and predominate  
190 behavior type (Table 1) whenever possible. The goal of observational surveys was to obtain  
191 locations across an entire daylight cycle at least once per week (usually assembled from several  
192 observation sessions conducted during different time periods on different days) for each flock  
193 over the duration of the data collection period. Coordinates of flocks were usually obtained by

194 recording observer position with a GPS unit; recording a bearing to the visually-estimated flock  
195 centroid with a compass; measuring distance to the flock centroid by rangefinder or estimating  
196 distance by eye (for shorter distances < 25 m); and then plotting the flock's estimated point  
197 location in GIS based on these parameters. In some cases, coordinates could be obtained directly  
198 by GPS after a flock vacated a previously-occupied location. As observers became increasingly  
199 familiar with the daily movement patterns of a flock, which tended to be consistent, their efforts  
200 were increasingly focused on the portions of the daily activity cycle that were more difficult to  
201 characterize.  
202

**Table 1. Description of Pinyon Jay behavior types that were recorded during observational and radio-telemetry surveys whenever possible.**

| Behavior Type         | Description                                                                                                                                                                                               |
|-----------------------|-----------------------------------------------------------------------------------------------------------------------------------------------------------------------------------------------------------|
| Caching               | Birds observed either caching or retrieving previously-cached pine nuts or other similar food items.                                                                                                      |
| Foraging              | Birds observed collecting any type of new food item in trees, shrubs, or on the ground, including pinyon nuts, other plant material, or insects.                                                          |
| Nesting               | Nest site or sites confirmed by direct observation or by confirmatory behaviors, such as carrying nest materials.                                                                                         |
| Roosting <sup>1</sup> | Birds present at a location during period(s) of darkness.                                                                                                                                                 |
| Loafing <sup>2</sup>  | Birds observed resting, usually in trees, while not engaged in any other listed behaviors.                                                                                                                |
| Flyover <sup>2</sup>  | Entire flock flying in a directional manner, without landing. Short flight movements by one or a few birds while the flock was engaged in one of the other listed behaviors were not considered flyovers. |

<sup>1</sup>Due to small sample size, this behavior type was used only for ordination analyses.

<sup>2</sup>Observations for these behavior types were excluded from analysis.

203  
204 Radio-telemetry surveys were also used to obtain Pinyon Jay locations for some of the studied  
205 flocks. Two methods were used to capture Pinyon Jays for radio-tagging; baited walk-in traps  
206 and mist nets. Traps were used where Pinyon Jays could be consistently drawn (determined by  
207 game cameras) to a supplemental food station baited with shelled peanuts, sunflower seeds, and  
208 dried corn. In these areas, a home-made wood and mesh walk-in trap (0.6 x 1.2x 0.9 m) with an

209 open door was placed at the site, and bait spread periodically inside the trap to habituate birds to  
210 entering the trap. When habituation was sufficient (determined by camera traps), capture  
211 attempts were made by rigging the door for remote manual release, observing activity at the trap  
212 from a blind ~ 25 m from the trap, and releasing the door with a pull cord when Pinyon Jays  
213 were inside the trap. Mist-nets were used in areas where walk-in traps were not viable, specially  
214 in locations routinely visited by Pinyon Jays where nets could be deployed without being easily  
215 detected by birds. Mist nets (60 mm mesh) were arrayed either singly, as doubles, or stacked,  
216 depending on the geometry of the woodland opening where they were erected. In some cases,  
217 call playback was also used to try to draw birds into the nets. Any Pinyon Jays captured by walk-  
218 in trap or mist net were weighed and aged; standard aluminum leg bands (U.S. Geological  
219 Survey) were attached; and radio transmitters (Advanced Telemetry Systems model A2450)  
220 were glued onto feather stubble clipped to ~ 0.3 cm above skin level in the interscapular area. No  
221 more than six individuals from any single flock were radio-tagged, since data were collected to  
222 characterize flocks rather than individual birds. Captured birds were handled and processed only  
223 by experienced individuals holding a U.S. Fish and Wildlife Service master banding permit.  
224 Radio-tagged birds were manually tracked using a handheld three-element Yagi antenna with an  
225 Advanced Telemetry Systems R410 or R100 receiver. The goal of radio-telemetry surveys was  
226 to collect hourly locations over one entire daylight cycle per week for each flock, either in a  
227 single long session or over several sessions of 3 – 5 hours on different days and at different  
228 times. Most often, telemetry fixes from one or more radio-tagged flock members were used to  
229 approach the flock and establish visual contact, at which point locational and behavior type  
230 attributes were collected exactly as described above for observational surveys. Occasionally,  
231 flock locations were estimated by biangulation or triangulation of telemetry bearings that were

232 post-processed using LOAS software (Ecological Software Solutions, LLC). In cases where the  
233 flock was not directly observed, behavior type was only recorded when it could be reasonably  
234 inferred based on previous observations (i.e. return to a nest colony location) or context (roosting  
235 locations at after sunset).

236  
237 For a given flock, locations could be obtained by either observational surveys, radio-telemetry  
238 surveys, or both, but because both approaches ultimately relied on the same observational  
239 process, we regarded the resulting data as comparable. Initially, radio-telemetry was the  
240 preferred survey approach, but by later data collection periods we determined that visual contact  
241 with most flocks could routinely be established without reliance on radio-tagged flock members,  
242 and our efforts to capture birds for radio-telemetry were discontinued.

243  
244 The full set of Pinyon Jay locations recorded during field work were filtered and processed prior  
245 to analysis. First, any locations where no behavior type was recorded were deleted. Next, all  
246 “flyover” locations and loafing locations (Table 1) were deleted, based on the premise that these  
247 could occur throughout and sometimes beyond the flock’s core home range. Finally, locations  
248 that represented the same flock engaged in the same behavior at the same location were  
249 combined as follows:

- 250 1) All nesting locations for a single flock were spatially averaged using the Mean Center  
251 tool in ArcMap 10.5 (ESRI, Redlands CA), based on the premise that at a given time, a  
252 flock has only one nesting area.
- 253 2) If caching, foraging, or roosting locations were closer together than 71.8 m, they were  
254 spatially averaged to generate a single location, as above. This was the smallest threshold

255 distance sufficient to prevent any overlap between the 0.405-ha habitat plots used to  
256 assess habitat (see below), so this process smoothed Pinyon Jay locations to a spatial  
257 scale that matched the habitat assessment scale.

258

259 After these steps, 152 Pinyon Jay locations with recorded behaviors were retained for analysis  
260 (see Table S1).

261

262 Data collection procedures described in this section were primarily observational and were not  
263 submitted to or approved by an Institutional Animal Care and Use Committee. Field work that  
264 involved capture, radio-tagging, and release of Pinyon Jays was conducted under U.S.

265 Department of the Interior Federal Bird Banding Permit # 22912, Idaho Fish and Game

266 Department Collection Permit # 120724, and Nevada Department of Wildlife Collecting Permit  
267 # 29948.

268

## 269 **Control site selection** (level 2 heading)

270

271 Control sites were selected from the pre-existing FIA data set of plots visited and measured  
272 between 2005-2013. FIA data provide a probabilistic and geographically unbiased assessment of  
273 forest / woodland attributes over time and space [46, 47] and a robust dataset to describe habitat  
274 for multiple species [48-52]. One FIA plot is randomly positioned within every cell of a  
275 sampling grid that covers all public and private forest land in the United States, with an overall  
276 density of one plot per 2,428 ha (6,000 acres) within the extent of that sampling frame [53]. Each  
277 year, 10% of these plots are surveyed or re-surveyed in the western U.S. using a spatially-

278 interpenetrating sampling design that avoids conflation of spatial with temporal trends [46]. The  
279 criteria used to select the subset of FIA plots that were appropriate control sites for this study  
280 were as follows:

281

282 1) The FIA plot had to be < 200 km from the nearest Pinyon Jay location retained for  
283 analysis.

284 2) Presence of pinyon-juniper woodland within the FIA plot had to be confirmed by direct  
285 observation of the field assessment crew during the most recent assessment visit. A  
286 woodland type classification based solely on remote-sensing data was not sufficient to  
287 meet this criterion.

288 3) The site had to be located in both the Central Great Basin Ecoregion [43] and in BCR 9.

289 4) The most recent assessment visit had to have occurred in 2005 or later.

290

291 In total, 346 FIA plots from the larger data set met these criteria (Fig 3) and were included in our  
292 analysis (see Table S1). Each control site was assigned a regional attribute that corresponded to  
293 the closest Pinyon Jay study area (n = 212 for the Eastern Nevada region, n = 81 for the Southern  
294 Idaho region, and n = 53 for the Central Nevada region). Control sites were not distributed  
295 symmetrically around the Pinyon Jay study areas (especially for Southern Idaho) because their  
296 extent was constrained by the distribution of pinyon-juniper woodland and by the USFS site  
297 selection process.

298

299 **Habitat assessment** (level 2 heading)

300

301 Forested habitat at Pinyon Jay locations was characterized using current FIA field protocols [54].  
302 Site attribute measurements at Pinyon Jay locations on non-forested land followed procedures  
303 outlined for a FIA All-Conditions Inventory [55]. For all Pinyon Jay activity sites, FIA plot  
304 centers were placed at the Pinyon Jay location point coordinates and assessments were  
305 performed by USFS crews fully trained in FIA protocols and procedures. Control sites were  
306 assessed as part of routine USFS operations in various years between 2005-2013 [56-58].

307  
308 FIA plot layout is based on a 0.405 ha circle that defines four subplots of 7.3 m diameter within  
309 which actual measurements are made. One subplot is located at the center of the larger circle,  
310 and the other three subplots have their centers equally spaced along its circumference (Fig 4). On  
311 a standard forested FIA plot, over 120 attributes are measured within each subplot to characterize  
312 location, condition, and vegetation [59]. Subplot data are then averaged or summed over subplots  
313 as appropriate and extrapolated to generate data at the whole-plot scale. The subset of FIA  
314 attributes that were considered for use in this analysis are presented and briefly described in  
315 Table 2.

316  
317 **Fig 4. Schematic diagram of a USFS FIA plot layout. Data used in this study consisted of**  
318 **full-plot values produced by either summing or averaging sub-plot data.**

319

---

**Table 2. Attributes describing Pinyon Jay habitat that were considered in this study. Brief descriptions of attributes are provided parenthetically, with complete descriptions of associated methodologies available in [59]. The 2<sup>nd</sup>, 3<sup>rd</sup>, and 4<sup>th</sup> columns indicate whether or not an attribute was used (Y = yes, N = No, NA = categorical attribute, not applicable) for the ordinations, logistic regressions, and data visualizations presented below. Footnotes provide additional explanations about attribute use considerations.**

---

| Attribute                                                                                                                                                   | Ordination     | Logistic Regression | Data Visualization |
|-------------------------------------------------------------------------------------------------------------------------------------------------------------|----------------|---------------------|--------------------|
| <b>FIA Attributes</b>                                                                                                                                       |                |                     |                    |
| Elevation (measured in feet at plot center)                                                                                                                 | Y              | Y                   | Y                  |
| Slope (expressed as slope percentage, or $\{\{rise/run\} \times 100\}$ at plot center)                                                                      | Y              | Y                   | Y                  |
| Habitat Type [60]                                                                                                                                           | NA             | N <sup>1</sup>      | N                  |
| Stand Age (age in years of the oldest pinyon pine or juniper tree on plot, as determined by coring)                                                         | Y              | Y                   | Y                  |
| Stand Density Index (index of three-dimensional tree density within stand [60])                                                                             | N <sup>2</sup> | N <sup>2</sup>      | Y <sup>2</sup>     |
| Canopy Cover (% by ocular estimation)                                                                                                                       | Y              | N <sup>3</sup>      | N                  |
| Tree Cover (% by ocular estimation)                                                                                                                         | Y              | Y                   | Y                  |
| Shrub Cover (% by ocular estimation)                                                                                                                        | Y              | Y                   | Y                  |
| Forb Cover (% by ocular estimation)                                                                                                                         | Y              | Y                   | Y                  |
| Grass Cover (% by ocular estimation)                                                                                                                        | Y              | Y                   | Y                  |
| Woody Debris (count of pieces of woody debris material along transects for seven different size diameter classes, defined by twig / branch diameter ranges) | Y              | Y <sup>4</sup>      | Y <sup>4</sup>     |
| Distance to Road (km from plot center, assigned using topographic maps; original ordinal ranges converted to range midpoints)                               | Y              | Y                   | Y                  |
| Disturbance Presence (“yes-no”, for any disturbances within the last five years)                                                                            | NA             | Y                   | N                  |
| Disturbance Type (categories of silvicultural treatment or other disturbance occurring within the previous five years)                                      | NA             | N <sup>5</sup>      | N                  |
| <b>Non-FIA Attribute</b>                                                                                                                                    |                |                     |                    |
| Distance to Edge (Distance to the lower-elevation woodland-shrubland ecotone, measured directly in on imagery in ArcMap 10.5)                               | N <sup>6</sup> | N <sup>6</sup>      | Y                  |



---

<sup>1</sup> All sites used in analysis were characterized by presence of at least some pinon pine and/or juniper trees, but the FIA habitat type distinctions were too fine-grained (33 different types, median number of sites / type = 5) for inclusion in analysis.

<sup>2</sup>Omitted from analyses due to high correlations with other attributes, but included in data visualizations because of possible synthetic interpretational value.

<sup>3</sup>Omitted because of high correlation to Tree Cover attribute ( $r = 0.68$ ).

<sup>4</sup>Reduced to a single attribute by Principle Component Analysis that described 86.1% of variation across all original classes.

<sup>5</sup>The level of articulation was too fine for the limited number ( $n=68$ ) of disturbed sites and too unevenly distributed among types, so only the “yes-no” disturbance attribute was retained.

<sup>6</sup>Omitted from ordinations and logistic regression because attribute estimation process was not part of the standardized FIA protocol. Retained in data visualizations for possible interpretive value

320

321 Based on our field observations of Pinyon Jay landscape use over the course of the study, we  
322 decide to create one additional non-FIA attribute, “Distance to Edge” (Table 2) which is the  
323 shortest linear distance between a Pinyon Jay location or control site and the lower-elevation  
324 woodland-shrubland ecotone. First, polylines were digitized in ArcMap 10.5 to delineate the  
325 approximate ecotonal boundary based on visual examination of imagery. This process did not  
326 delineate woodland – shrubland boundaries inside well-defined woodland patches, but instead  
327 defined distinct woodland patches based on their lowest-elevation ecotonal boundary. Then, the  
328 shortest distance from each Pinyon Jay location or control site to the polyline was computed  
329 using the Near tool in ArcMap 10.5. This value was usually positive, but could be negative if a  
330 Pinyon Jay location was in shrubland at a lower elevation than the polyline. Because the  
331 Distance to Edge metric was not a FIA attribute, it was used only for data visualizations, not for  
332 statistical analysis.

333

334 **Analysis** (level 2 heading)

335

336 *Data* (level 3 heading)

337

338 The complete data set used for all analyses and summarizations is provided in Table S1.

339

340 *Ordination* (level 3 heading)

341

342 To visualize how the habitat characteristics of Pinyon Jay locations for each behavior type  
343 overlapped with control sites, we performed region-specific ordinations on continuous FIA  
344 habitat attributes (Table 2) using nonmetric multidimensional scaling (NMDS). NMDS  
345 optimizes the non-parametric monotonic relationship among the data and the visualization space,  
346 providing the best low-dimensional representation [61-63]. All ordinated attributes were  
347 standardized with a z-transformation across all of the regions prior to the NMDS to promote  
348 optimization, which was defined as minimizing the stress value [63]. The NMDS was performed  
349 with the metaMDS function in the vegan package (v 2.5-5; [64]) in R (v3.5.1; [65]), using the  
350 Euclidian distance with two dimensions to force a visualizable representation. The maximum  
351 number of iterations was increased from the default of 200 to  $10^{10}$  and the maximum number of  
352 runs was increased from 20 to 1,000 to achieve convergent solutions across repeated runs.  
353 Defaults for auto-transformation, extended dissimilarities, and weighted average scoring were  
354 turned off because they were not applicable to our transformed input data set.

355

356 *Logistic Regression* (level 3 heading)

357

358 To evaluate the effects of measured habitat attributes on Pinyon Jay occupancy by behavior type  
359 [42, 44, 66] we used logistic regressions for each behavior type that had sufficient data (i.e.  
360 caching, foraging, nesting). Roosting location were not analyzed because of low sample size  
361 ( $n=3$ ). Because the ratio of Pinyon Jay locations to control sites was low, the odds ratio output  
362 from logistic regression can be treated as an approximation to the resource selection function  
363 [42, 67, 68]. However, it is important to recognize that the intercept value of the logistic  
364 regression does not estimate the overall use probability, as the Pinyon Jay locations were not  
365 randomly selected [42].

366  
367 Initial evaluation of available predictor attributes (Table 2) consisted of plotting data pairs,  
368 evaluating correlations, and preliminary overall model fitting to ensure base-level convergence.  
369 Several attributes were eliminated from the analysis due to high correlations with other attributes  
370 or highly uneven distribution of values. Others were combined into a single attribute with  
371 principle components analysis (Table 2). All continuous attributes used for analysis (Table 2)  
372 were converted to metric units and z-transformed to facilitate model fitting and term comparison.

373  
374 For the logistic regression models, we split the control sites assigned to each region (see above)  
375 according to behavior types in proportion to behavior frequency, rather than “reusing” control  
376 sites across multiple behavior types. Splitting was randomized and permuted 10,000 times to  
377 account for variation in the dataset splitting process. For each permutation, the control data were  
378 first split among the behaviors types within each region, then the data for a given behavior type  
379 were combined across the three regions and analyzed using a generalized (binomial) mixed  
380 model fit with the glmer function in the lme4 package (v1.1-19; [69]) in R (v3.5.1; [65]). The

381 permutations were then combined to integrate over the sample allocation variation and estimate  
382 overall terms. This was done by first discarding any permutations that did not converge due to  
383 unreasonable splits of control sites that could occur within the randomization. Then, for each  
384 permutation, a single set of fixed effects parameters were drawn from the multivariate normal  
385 distribution described by the glmer model fit using the rmvnorm function in the mvtnorm  
386 package (v1.0-8; [70]) in R (v3.5.1; [65]). By drawing from the distribution within each  
387 permutation, the full set of parameter values across permutations includes both parameter  
388 estimation uncertainty and data allocation uncertainty. To avoid distributional assumptions in  
389 evaluating the significance of the parameter estimates, we tested whether the estimate  
390 significantly differed from 0 by using a permutation-style two-tailed approach [71]. This  
391 involved using the empirical cumulative distribution function (calculated using the ecdf function  
392 in the stats package in base R (v3.5.1; [65]) to estimate the two tail probabilities with respect to  
393 0, taking the smaller value as the focal tail, and doubling that tail's probability. We combined the  
394 estimates of the random effects (one for each successful permutation) across all of the  
395 permutations to generate the distribution of values for each random effects term across the  
396 uncertainty in control data allocation.

397

398 Within-sample classification accuracy of logistic regression models for each Pinyon Jay behavior  
399 type was averaged over all 10,000 permutations. Because the number of Pinyon Jay locations for  
400 each behavior type was limited, we did not withhold a subset of locations for external validation.

401

402 *Data visualization* (level 3 heading)

403

404 To aid in the interpreting statistical results and to highlight univariate patterns of interest, box  
405 plots were created for each continuous habitat attribute shown in Table 2, contrasting the  
406 distribution of attribute values for behavior-specific Pinyon Jay locations and control points.

407

## 408 **Results** (level 1 heading)

409

### 410 **Data summary** (level 2 heading)

411

412 Behavior-specific Pinyon Jay locations (n = 152) were obtained from 15 different flocks. Details  
413 about distribution of Pinyon Jay behavior type locations among study regions, apportionment of  
414 control sites, number of flocks per study area, and methods of data collection used within study  
415 areas are summarized in Table 3. Pinyon Jay data were not fully symmetrical among the study  
416 areas. Nesting was not recorded in Southern Idaho because the data collection period excluded  
417 the breeding season, and our data recording protocol in 2008-2009 for Eastern Nevada did not  
418 specify the foraging behavior type. Only caching locations were recorded in all three study areas,  
419 and only in the Central Nevada study area were all three major behavior types (caching,  
420 foraging, and nesting) recorded.

421

**Table 3. Summary of Pinyon Jay locations after data processing, by behavior type and by region / study area. Shown parenthetically in 2<sup>nd</sup> - 5<sup>th</sup> columns are the number of control sites assigned to each unique combination of study region x behavior type within logistic regression models as described in above. The final column summarizes the number of different Pinyon Jay flocks from which data were collected in each study area, with the data collection methods used shown in brackets (T = telemetry surveys, with number of deployed radio tags in parentheses; O = observational surveys).**

| Study Region / Area | # Caching Sites | # Foraging Sites | # Nesting Sites | # Roosting Sites | # Flocks [Method of Study] |
|---------------------|-----------------|------------------|-----------------|------------------|----------------------------|
|---------------------|-----------------|------------------|-----------------|------------------|----------------------------|

|                |          |         |          |         |                                                     |
|----------------|----------|---------|----------|---------|-----------------------------------------------------|
| Eastern Nevada | 12 (106) | 0 (0)   | 12 (106) | 3 (N/A) | 2 flocks [Flock #1 = T(6); Flock #2 = T(6)]         |
| Southern Idaho | 32 (51)  | 19 (30) | 0 (0)    | 0 (N/A) | 2 flocks [Flock #1 = O & T(6); Flock #2 = O & T(2)] |
| Central Nevada | 26 (18)  | 22 (15) | 28 (20)  | 0 (N/A) | 11 flocks [All = O]                                 |

422

423

## 424 **Ordination** (level 2 heading)

425

426 The NMDS ordination found convergent solutions within 28, 388, and 20 runs for the Eastern  
427 Nevada, Southern Idaho, and Central Nevada regions, respectively (Fig 5). Each of the  
428 ordinations was well-correlated with true distances with stress values of 0.183, 0.127, and 0.161,  
429 respectively. Notably, for all three regions, Pinyon Jay locations formed distinct clusters in the  
430 NMDS plots that were easily distinguishable from the broader distribution of control sites (Fig 5)  
431 Degree of overlap among Pinyon Jay behavior type clusters varied somewhat across study  
432 regions, though nesting locations and caching locations were distinct in the two regions where  
433 both types of data were available. NMDS results suggested that the locations where Pinyon Jays  
434 occurred in the three study areas tended to be different than typical control sites within the  
435 corresponding study regions, and that Pinyon Jays tended to use different habitats for different  
436 behaviors.

437

438 **Fig 5. NMDS ordination results for each region, by location type. Note that each region's**  
439 **ordination is independent and the axes cannot be compared among them.**

440

## 441 **Logistic regression** (level 2 heading)

442

443 Logistic regression models offer potential insights into which habitat covariates underpin the  
444 differentiation seen in the ordinations. We note, however, that within our logistic regressions,  
445 many predictors that had strong and statistically significant effects for a majority of iterations in  
446 the control site allocation process became non-significant when all iterations were combined.  
447 Because of this sensitivity to control site allocation, examination of data visualizations (next  
448 section) may assist in the interpretation of model results. Internal classification accuracy of  
449 behavior-specific Pinyon Jay locations versus control sites (averaged overall all iterations) was  
450 high (0.890 for the caching model, 0.863 for the foraging model, and 0.920 for the nesting  
451 model).

452

453 Models indicated that Pinyon Jay caching locations were more likely to occur with lower slope,  
454 lower tree cover, increased woody debris, shorter distance to roads, and more disturbance than  
455 control sites (Table 4). There was also a strong effect of decreased elevation, though it was not  
456 significant when averaged across all control allocation iterations. None of the predictors for  
457 Pinyon Jay foraging locations were statistically significant when averaged across all iterations  
458 due to high standard errors, but the largest effect sizes were noted for lower slope, less grass and  
459 forb cover, increased woody debris, and shorter distance to roads compared with control sites  
460 (Table 4). Pinyon Jay nesting locations were more likely to occur at lower elevations with  
461 decreased forb cover and increased woody debris compared to control sites (Table 4). Across all  
462 three Pinyon Jay behavior types, occupancy probability generally increased with lower elevation,  
463 lower slope, lower forb cover, shorter distance to roads, and increased woody debris compared to

464 control sites (Table 4). Lower tree cover was a marginally significant predictor for caching  
 465 locations but was not a significant predictor for foraging and nesting locations.  
 466

**Table 4. Logistic regression results over all control site allocation iterations for the caching, foraging, and nesting location analyses. Fixed effects are reported as mean and standard error of the estimate and the two-tailed p value; random effects are reported as mean and standard error of the estimate and the probability (fraction of permutations) that the term was equal to 0. Bolded terms are significant at  $\alpha = 0.05$ .**

| <b>CACHING LOCATIONS</b>  |               |                |                    |
|---------------------------|---------------|----------------|--------------------|
|                           | Mean          | Standard Error | p                  |
| <b>Fixed Effect</b>       |               |                |                    |
| <b>Intercept</b>          | <b>-3.687</b> | <b>1.162</b>   | <b>0.001</b>       |
| Elevation                 | -0.405        | 0.585          | 0.481              |
| Slope                     | <b>-2.066</b> | <b>0.557</b>   | <b>&lt; 0.0001</b> |
| Stand Age                 | -0.177        | 0.432          | 0.654              |
| <b>Tree Cover</b>         | <b>-0.913</b> | <b>0.553</b>   | <b>0.075</b>       |
| Shrub Cover               | 0.251         | 0.349          | 0.445              |
| Forb Cover                | -0.021        | 0.3            | 0.904              |
| Grass Cover               | 0.377         | 0.439          | 0.385              |
| Woody Debris              | <b>1.235</b>  | <b>0.818</b>   | <b>0.010</b>       |
| <b>Distance to Road</b>   | <b>-2.712</b> | <b>0.789</b>   | <b>&lt; 0.0001</b> |
| Disturbance               | <b>1.971</b>  | <b>0.951</b>   | <b>0.022</b>       |
| <b>Random Effect</b>      |               |                |                    |
| Eastern Nevada: Intercept | 1.838         | 0.413          | 0.0001             |
| Southern Idaho: Intercept | -1.320        | 0.301          | 0.0001             |
| Central Nevada: Intercept | -0.522        | 0.288          | 0.0001             |
| <b>FORAGING LOCATIONS</b> |               |                |                    |
| <b>Fixed Effect</b>       |               |                |                    |
| Intercept                 | -5.486        | 7.418          | 0.044              |
| Elevation                 | -1.566        | 2.790          | 0.317              |
| Slope                     | -4.184        | 6.299          | 0.058              |
| Stand Age                 | -2.013        | 3.641          | 0.236              |
| Tree Cover                | 1.931         | 3.079          | 0.200              |
| Shrub Cover               | 1.380         | 2.479          | 0.311              |
| Forb Cover                | -9.236        | 14.819         | 0.080              |
| Grass Cover               | -4.970        | 8.384          | 0.113              |
| Wood Debris               | 4.419         | 9.650          | 0.053              |
| Distance to Road          | -3.326        | 4.848          | 0.063              |
| Disturbance               | -1.700        | 75.272         | 0.555              |
| <b>Random Effect</b>      |               |                |                    |



| Eastern Nevada: Intercept | 0.686         | 1.076        | 0.290        |
|---------------------------|---------------|--------------|--------------|
| Southern Idaho: Intercept | N/A           | N/A          | N/A          |
| Central Nevada: Intercept | -0.707        | 1.327        | 0.290        |
| NESTING LOCATIONS         |               |              |              |
| Fixed Effect              |               |              |              |
| <b>Intercept</b>          | <b>-4.723</b> | <b>2.623</b> | <b>0.021</b> |
| <b>Elevation</b>          | <b>-2.445</b> | <b>1.600</b> | <b>0.004</b> |
| Slope                     | -1.249        | 1.090        | 0.154        |
| Stand Age                 | 0.528         | 1.016        | 0.564        |
| Tree Cover                | 0.500         | 1.030        | 0.570        |
| Shrub Cover               | 0.261         | 0.848        | 0.743        |
| Forb Cover                | <b>-7.110</b> | <b>4.247</b> | <b>0.022</b> |
| Grass Cover               | 0.123         | 1.256        | 0.983        |
| <b>Woody Debris</b>       | <b>2.156</b>  | <b>1.266</b> | <b>0.003</b> |
| Distance to Road          | -1.118        | 1.291        | 0.289        |
| Disturbance               | 2.606         | 2.406        | 0.115        |
| Random Effect             |               |              |              |
| Eastern Nevada: Intercept | 2.116         | 0.903        | 0            |
| Southern Idaho: Intercept | -2.088        | 0.904        | 0            |
| Central Nevada: Intercept | NA            | NA           | NA           |

467

468

469 The random effects components of the three models were all estimated to be non-zero, although  
 470 the foraging model estimated a zero-value in 29% of allocation iterations, whereas the caching  
 471 model estimated a zero-value in < 1% of iterations. The additional complexity introduced by a  
 472 singularity/boundary condition (a zero-value random effect) within many foraging model  
 473 iterations may have contributed to the variability (and thus reduced significance) seen in the  
 474 parameter estimates.

475

476 **Data visualizations** (level 2 heading)

477

478 Fig 6 shows box plots for all FIA attributes included in logistic regression models combined  
479 across all study regions, and Fig 7 shows box plots for two additional habitat attributes (the FIA  
480 Stand Density Index attribute and the non-FIA Distance to Edge attribute) that were not included  
481 in logistic regressions, but which showed patterns of interest with regard to Pinyon Jay  
482 occupancy. Notable patterns in these box plots are as follows:

483

484 1) Across all study regions, locations used by Pinyon Jays appeared to be a distinct subset  
485 available woodland habitat with regard to many habitat attributes. This is consistent with  
486 the patterns observed in the NMDS ordination (Fig 5). Additionally, locations used by  
487 Pinyon Jays for different behaviors appeared to vary with regard to multiple habitat  
488 attributes.

489 2) Compared to available habitat, caching locations were concentrated in lower elevation,  
490 lower-slope areas with young woodland stands, low tree cover, and high shrub, forb, and  
491 grass cover. The Stand Density Index was typically very low for caching locations, which  
492 were also highly concentrated near the woodland-shrubland ecotone (i.e. low Distance to  
493 Edge values). In fact, many caching locations occurred in the pure shrubland habitat  
494 located down-slope from the woodland-shrubland ecotone (note that these pure  
495 shrublands were not represented in the sample of FIA control sites).

496 3) Foraging locations were also concentrated in lower elevation and lower slope areas, but  
497 were somewhat higher and steeper than caching locations, with somewhat higher stand  
498 densities. Foraging locations had more woody debris than typical control sites, but stand  
499 age, tree cover, forb cover, and grass cover were comparable to control sites. Shrub cover  
500 in foraging locations was highly variable, but tended to be higher than in control sites.

501 Foraging locations were close to the woodland-shrubland ecotone, with lower stand  
502 density indices, though to a less extent than caching locations

503 4) Nesting locations also tended to occur at lower elevations and lower slopes, but to a  
504 lesser degree than foraging and caching locations. Stand age and shrub cover were  
505 comparable between nesting locations and control sites, but nesting locations had higher  
506 tree cover, lower forb cover, and more woody debris. Stand density was somewhat lower  
507 for nesting locations than for control sites, but with considerable overlap. Nesting  
508 locations were also concentrated close to the woodland-shrubland ecotone, but to a lesser  
509 degree than foraging locations.

510 5) There was a distinct pattern of increasing elevation and slope, increasing distance from  
511 edge, and increasing stand density moving from caching locations to foraging locations to  
512 nesting locations, but all three behavior types had lower values for these attributes than  
513 typical control sites.

514

515 **Fig 6: Box plots for all continuous attributes used in logistic regression models, as**  
516 **described in Table 2. Y-axis codes are Co = control sites, N = Pinyon Jay nesting**  
517 **locations, F = Pinyon Jay foraging locations, and Ca = Pinyon Jay caching locations.**  
518 **For better visual clarity, the extreme high range of observed Forb Cover values (15**  
519 **– 25%) is truncated, omitting a small number of Co sites and Ca locations.**

520

521 **Fig 7: Box plots for two habitat attributes not used in logistic regression models, as**  
522 **described in Table 2. Y-axis codes are Co = control sites, N = Pinyon Jay nesting**  
523 **locations, F = Pinyon Jay foraging locations, and Ca = Pinyon Jay caching locations.**

524           **For better visual clarity, the extreme high range of observed Distance to Edge values**  
525           **(6,000 – 12,000 m) values are truncated, omitting a small number of Co sites.**

526

527

## 528                                   **Discussion (level 1 heading)**

529

### 530   **Main findings and significance (level 2 heading)**

531

532   This study offers the first systematic description of Pinyon Jay occupancy patterns and behavior-  
533   specific habitat characteristics in the Great Basin. The combination of ordinations, logistic  
534   regressions, and data visualizations presented in this study suggest that Pinyon Jays use pinyon-  
535   juniper woodlands selectively. All Pinyon Jay locations in our study areas were concentrated in  
536   or near lower-elevation, flatter woodlands and were less common in higher-elevation, steeper  
537   woodlands. Additionally, the areas used for different Pinyon Jay behaviors appear to have  
538   distinctive (but overlapping) habitat profiles, with caching, foraging, and nesting arrayed  
539   sequentially along gradients of increasing slope, elevation, and stand density. Similar patterns of  
540   Pinyon Jay caching and nesting activities partitioned along elevation and stocking gradients were  
541   observed by Johnson et al. [23] within a pinyon-juniper (*P. edulis* / *Juniperus spp.* association)  
542   woodland system in New Mexico, suggesting that habitat partitioning by behavior along an  
543   elevational gradient could be present across a broader physiographic range than our study  
544   regions.

545

546 Pinyon Jay caching locations were concentrated in open woodland stands with high shrub and  
547 grass cover, which are similar to the Phase I (early successional) pinyon-juniper woodlands  
548 defined in the classification scheme by Miller et al. [33], and sometimes occurred in pure  
549 shrublands. This occurrence pattern could have a mutualistic explanation [3]. From the pinyon  
550 pine perspective, seedlings likely experience less competition from established trees in more  
551 open areas, and seeds placed next to shrubs, rocks, or woody debris in otherwise open areas may  
552 benefit from favorable microsite conditions created and maintained by those features [72, 73].  
553 From the Pinyon Jay perspective, pinyon pine seeds cached away from their source of origin may  
554 be less likely to be discovered and eaten by small mammals that specialize on pinyon seeds [73,  
555 74].

556  
557 Pinyon Jay foraging locations generally occurred in older (though still relatively young) stands  
558 than caching locations, across a wide range of tree cover values. Given that foraging behavior as  
559 defined in our study encompassed the gathering of diverse food items from trees, shrubs, and  
560 ground, areas with these characteristics may offer a beneficial combination of pinyon pines in  
561 their most productive seed-bearing years [75, 76] interspersed with areas where abundant insect  
562 prey is available due to higher shrub or ground cover [77]. The habitat characteristics of Pinyon  
563 Jay foraging locations correspond to a mosaic of Phase I and Phase II pinyon-juniper  
564 successional stages [33].

565  
566 Pinyon Jay nesting locations tended to be concentrated in areas with higher tree cover and more  
567 woody debris, presumably because of the concealment they offer [23, 78]. However, like caching  
568 and foraging locations, nesting locations were concentrated in lower elevation, lower slope areas,

569 and steeper, higher sites that otherwise offered good concealment for nesting locations appeared  
570 to be avoided. Pinyon Jay nesting locations correspond best with the denser portion of the Phase  
571 II class of pinyon-juniper woodlands, but may also include some Phase III areas [33].

572

573 All Pinyon Jay locations, regardless of behavior type, were concentrated in lower-elevation  
574 woodlands (most likely a mix of Phase I and Phase II classes) near the woodland-shrubland  
575 ecotone. This could occur because of the longer snow-free season of lower elevations, or the  
576 presence of a mosaic of desirable habitat characteristics needed to support different behavior  
577 types. Phase I and Phase II woodlands are relatively common at lower elevations where Pinyon  
578 Jay locations are concentrated, whereas the proportion of Phase III woodlands tends to increase  
579 with increasing elevations based on our field observations.

580

581 In addition to providing important information about Pinyon Jay occupancy patterns and habitat  
582 use, these findings are potentially significant for vegetation management planning and  
583 implementation because Pinyon Jays in our three study areas appear to prefer the same lower-  
584 elevation, relatively-open woodlands where most woodland removal management is performed  
585 [79, 80]. These vegetation management projects, which are most often conducted to create or  
586 improve habitat for Greater Sage-Grouse [81] (but see Miller et al. [22] and Somershoe et al.  
587 [15] for others reasons for woodland treatments), have resulted in the removal of an estimated  
588 45,000 ha of pinyon-juniper woodland in the Great Basin portions of Nevada, Utah, and Idaho  
589 over the last eight years alone (Witt, unpublished USFS data). The pace of this activity appears  
590 to be steady or accelerating, and may therefore be or become a significant factor affecting Pinyon  
591 Jay populations, either negatively or positively. Information from other regions suggests that

592 woodland treatments can have unintended effects on Pinyon Jays. For example, Johnson et al.  
593 [82] found that a fuels treatment within pinyon-juniper woodlands in northern New Mexico that  
594 reduced tree density by almost 90 percent prompted the local Pinyon Jay flock to avoid the  
595 treated area altogether. To date, however, almost no direct monitoring has been conducted in the  
596 Great Basin to determine if and how Pinyon Jay flocks respond to vegetation management  
597 projects that occur within or close to their home ranges.

598

## 599 **Interpretational considerations** (level 2 heading)

600

601 The findings presented in this study should be interpreted with the following considerations in  
602 mind:

- 603 1) Pinyon Jay data were collected at the three distinct study areas that collectively  
604 encompassed 175,630 ha. Although this was a large area, it represents only a small  
605 portion of the Great Basin region that we would like to characterize.
- 606 2) This study combined data from three distinct projects that covered different years and  
607 seasons. This is most immediately relevant to interpreting the foraging model, given that  
608 seasonal variation in foraging behaviors and locations are plausible.
- 609 3) We equated “potential habitat” for Pinyon Jays to all pinyon-juniper woodlands lying  
610 within 200 km of any Pinyon Jay study area, as sampled by FIA plots. Although  
611 inferences from this study can cautiously be extended to the pinyon-juniper woodlands  
612 beyond our immediate Pinyon Jay study areas (subject to confirmation in future studies;  
613 see Johnson and Sadoti [78] for caveats about model transferability to similar systems) it  
614 does not extend to other forest types or regions where Pinyon Jays occur.

- 615 4) Our analysis does not distinguish between flocks within a study area, and does not allow  
616 us to draw inferences about inter-flock variability with regard to behavior-specific  
617 occupancy patterns.
- 618 5) The iterative allocation of control sites among Pinyon Jay behavior types in logistic  
619 regression modeling was necessary, but it could have diluted the statistical significance of  
620 some important predictors of occupancy. Future modeling efforts where the spatial  
621 extents and sample sizes of Pinyon Jay data and control data are better matched should  
622 reduce this issue. Models created from data sets with a large sample of Pinyon Jay  
623 locations will also allow data to be withheld from the model building process and used  
624 for external validation.
- 625 6) Interpreting the relationship between Pinyon Jay occurrence and distance to road is  
626 complex and potentially non-causal. Roads density is typically higher in lower-elevation,  
627 flatter areas, and Pinyon Jays prefer these areas for reasons completely unrelated to the  
628 proximity of roads. However, one author has suggested the vegetation typically present  
629 alongside graded, unpaved roads may provide valuable foraging opportunities for Pinyon  
630 Jays [83].
- 631 7) The Distance to Edge attribute used for data visualizations shows clear contrasts across  
632 behavior-specific Pinyon Jay locations and control sites, but it needs to be further  
633 investigated using more formal methods for delineating ecotones. Additionally, the  
634 patterns seen in our data (Fig 7) were enhanced because control sites by definition  
635 excluded the pure or near-pure shrublands that comprised a significant proportion of  
636 Pinyon Jay caching locations, and a smaller proportion of foraging locations.  
637



638 Currently, we are analyzing a separate Pinyon Jay data set derived from a long-term statewide  
639 bird monitoring program in Nevada. Because these data were obtained from a broader-scale  
640 fully-randomized sampling design and used a fully standardized survey protocol, they should  
641 provide a useful independent characterization of Pinyon Jay occupancy patterns in the Great  
642 Basin.

643

## 644 **Conclusions and recommendations** (level 2 heading)

645

646 Pinyon Jay populations have been declining precipitously for at least the last half-century, while  
647 the pinyon-juniper woodlands that they inhabit in the Great Basin are thought by many to have  
648 been expanding at unprecedented rates [84-87]. Given this apparent paradox, identifying the  
649 reasons for Pinyon Jay declines is critical for defining constructive conservation actions that  
650 ensure the species' long-term viability [3, 15]. This urgency is amplified by the widespread and  
651 potentially accelerating woodland management activities in the Great Basin that prioritize  
652 creation or preservation of shrublands without a clear understanding of their impacts on Pinyon  
653 Jays and other woodland-associated birds. Progress towards a more inclusive management  
654 paradigm can be achieved through: a) better knowledge of Pinyon Jay ecology and habitat  
655 requirements, b) monitoring of management impacts, c) better understanding of the ecology and  
656 dynamics of the woodlands that comprise Pinyon Jay habitat, and d) integration of knowledge  
657 obtained from these three areas into existing vegetation management protocols and guidance.

658

659 A fundamental need is for more robust, spatially-extensive data characterizing Pinyon Jay  
660 occupancy patterns and habitat use as a function of region, season, and behavior type, both

661 across and within the individual flock level. To maximize their value, these data would ideally be  
662 gathered using a standardized survey protocol. Pinyon Jays, however, present multiple  
663 challenges to the field biologist, study designer, and data analyst [15], and approaches suitable  
664 for typical passerine birds may be suboptimal for Pinyon Jays for several reasons. Unlike species  
665 where a single breeding pair occupies a clearly-delineated territory at all times during the  
666 breeding season, Pinyon Jays occupy (and presumably select) habitat at the flock and subflock  
667 level. Pinyon Jays are also year-round residents, and protecting breeding habitat alone may be  
668 insufficient for effective conservation. The Pinyon Jay's pattern of habitat use, which involves  
669 temporal flock movements across a relatively large home range to accommodate different  
670 behaviors and take advantage of seasonally-varying food resources, has potentially profound  
671 effects on both the detection properties of a given survey protocol and the ecologically-legitimate  
672 interpretation of those detection patterns. As a simple example, a Pinyon Jay flock may be  
673 frequently absent from a critically-important subset of its home range, either during portions of  
674 the day, or during entire seasons. Similarly, roaming flocks may frequently fly over or loaf in  
675 areas of the home range that are not critical to home range quality or viability. To provide  
676 accurate and actionable information about the habitat requirements of Pinyon Jays, survey  
677 protocols and research study designs need to account for these realities appropriately, operate at  
678 scales that reflect actual Pinyon Jay habitat selection patterns, and be guided by a sampling  
679 framework that produces well-balanced data suitable for presence / absence modeling. The  
680 multi-agency Pinyon Jay Working Group [15] is currently actively investigating options for  
681 standardized Pinyon Jay survey protocols. The same group's Pinyon Jay Conservation Strategy  
682 [15] also noted that some of the information needed to better characterize Pinyon Jay habitat  
683 requirements could be obtained by systematically monitoring Pinyon Jay responses to vegetation

684 management activities, especially in situations where their pre-treatment presence has been  
685 confirmed by baseline or clearance surveys.

686  
687 With regard to pinyon-juniper woodlands, their structural attributes and other characteristics that  
688 might be limiting to Pinyon Jay populations need to be further studied. We suggest that it may be  
689 especially important to identify the correlates or profiles of tree stands and landscapes that  
690 exhibit a predictable and/or abundant pinyon pine mast [22]. Our preliminary review of FIA data  
691 collected in Nevada between 2006-2015 suggests that woodlands matching the structural  
692 characteristics Pinyon Jays used for foraging in this study are 5-7 times less extensive than  
693 nesting or caching habitat in Nevada (unpublished USFS data). Presence of reliably productive  
694 stands within the home range could be especially important to Pinyon Jays during years of more  
695 generally depressed pine mast production. Given evidence of reduced mast production in pinyon  
696 pine [88], and associated changes in habitat use by Pinyon Jays [24] in some areas affected by  
697 climate change, it might be critical to long-term Pinyon Jay conservation to systematically  
698 investigate the quality and quantity of good foraging areas.

699  
700 In addition, more research is needed to better clarify the degree to which woodland expansion  
701 and infill is part of a historically “normal” dynamic, versus a problematic departure condition. In  
702 the absence of this more holistic understanding, colonization of shrublands by trees tends to be  
703 widely regarded as “invasive”, even though at least some of these recently colonized areas  
704 appear to be an important component of Pinyon Jay habitat in the Great Basin. Achieving this  
705 broader perspective may be a necessary prerequisite to successfully accommodating the needs of

706 Greater Sage-Grouse, Pinyon Jays, and other sensitive shrubland and woodland bird species  
707 within the overall framework of pinyon-juniper woodland management.

708  
709 Ultimately, accruing information about Pinyon Jays must be incorporated into woodland  
710 management paradigms and protocols in the Great Basin (see Ricca et al. [89] for an example) in  
711 ways that accommodate both previously-identified and newly-emerging goals within the context  
712 of healthy ecosystem function [90]. For the present, Somershoe et al. [15] provide guidance for  
713 managers seeking to incorporate Pinyon Jay conservation measures into their vegetation  
714 management projects based the extent of current knowledge.

715  
716

## 717 **Acknowledgments (level 1 heading)**

718  
719 Field work was conducted by Gustavo Gonzalez, Michael Maples, and John B. Free (in Eastern  
720 Nevada), by Murrelet Halterman, Natasha Peters, Larry Teske, and Mercer Owen (in Southern  
721 Idaho, and by Mercer Owen and Sue Brunner (in Central Nevada). Their efforts, which were  
722 supplemented by the authors, are much appreciated. Statistical analysis was performed by  
723 Juniper Simonas of Dapper Stats ([www.dapperstats.com](http://www.dapperstats.com)).

724  
725 Wallace Keck, Superintendent of City of Rocks National Reserve and Park Manager for Castle  
726 Rock State Park, provided us with extensive information about local Pinyon Jay populations,  
727 generously allowed us use of park facilities, with further assistance from Trenton Durfee. Many  
728 local landowners permitted us to access to their property, notable among them LeAnn and Kim

729 Draper, whose property functioned as a capture location and staging area for telemetry efforts. At  
730 the Bureau of Land Management, Sandra Brewer and John Wilson provided invaluable  
731 assistance and support in Central Nevada. We thank all of these individuals.

732

733

## 734 **References (level 1 heading)**

735 1. Burleigh TD. Birds of Idaho. Caldwell: Caxton Printers Ltd.; 1972.

736

737 2. Grenfell Jr. WE, Laudenslayer Jr. WF. The distribution of California birds. San Francisco,  
738 CA: Calif. Wildlife/Habitat Relationships Program, Publ. No. 4; California Department of Fish  
739 and Game Bulletin, Sacramento, and U.S. Forest Service. 1983.

740

741 3. Johnson K, Balda RP. Pinyon Jay (*Gymnorhinus cyanocephalus*). 2020. In: Rodewald PG,  
742 Keeny BK, editors. Birds of the World. Version 2.0. NY: Cornell Lab of Ornithology. Available  
743 from <https://birdsoftheworld.org> Subscription required.

744

745 4. Sauer JR, Niven DK, Hines JE, Ziolkowski, Jr. DJ, Pardieck KL, Fallon JE. The North  
746 American Breeding Bird Survey [Internet]. Laurel, MD: USGS Patuxent Wildlife Research  
747 Center; 2017. Results and Analysis 1966-2015. Version 2.07. Available from: [https://www.mbr-](https://www.mbr-pwrc.usgs.gov/bbs/)  
748 [pwrc.usgs.gov/bbs/](https://www.mbr-pwrc.usgs.gov/bbs/)

749

- 750 5. Little Jr. EL. Atlas of United States trees. Volume 1. Conifers and important hardwoods.  
751 Washington, DC: U.S. Department of Agriculture, Forest Service; 1971. Misc. Publ. 1146. p.  
752 320  
753
- 754 6. Marzluff, JM, Balda RP. The Pinyon Jay: Behavioral Ecology of a Colonial and  
755 Cooperative Corvid. London: Poyser; 1992.  
756
- 757 7. Balda RP, Bateman GC. Flocking and annual cycle of the Pinyon Jay, *Gymnorhinus*  
758 *cycanocephalus*. *The Condor*. 1971;73: 278-302.  
759
- 760 8. Bateman GC, Balda RP. Growth, development, and food habits of young Pinon Jays. *Auk*.  
761 1973;90(1): 39-61.  
762
- 763 9. NABCI Bird Conservation Regions [Internet]. Canada: Bird Studies Canada on behalf of the  
764 North American Bird Conservation Initiative. [cited 2017 Oct 3]. Available from:  
765 <http://www.birdscanada.org/research/gislab/index.jsp?targetpg=bcr>  
766
- 767 10. Boone JD, Ammon E, Johnson K. Long-term declines in the Pinyon Jay and management  
768 implications for Pinyon-Juniper woodlands. In: Shuford WD, Gill Jr. RE, Handel CM, editors.  
769 Trends and Traditions: Avifaunal Change in Western North America. Studies of Western Birds  
770 3. Camarillo, CA: Western Field Ornithologists; 2019. p 190-197. Available from: DOI:  
771 10.21199/SWB3.10  
772

- 773 11. Rosenberg KV, Kennedy JA, Dettmers R, Ford RP, Reynolds D, Alexander JD, et al.  
774 Partners in Flight Landbird Conservation Plan: 2016 revision of Canada and continental United  
775 States. Partners in Flight Science Committee; 2016.  
776
- 777 12. U.S. Bureau of Land Management [Internet]. Updated Bureau of Land Management (BLM)  
778 Sensitive Species List for Nevada; 2017. Available from: <https://blm.gov/policy/nv-im-2018-003>  
779
- 780 13. BirdLife International [Internet]. The IUCN Red List of Threatened Species, *Gymnorhinus*  
781 *cyaenocephalus* (amended version of 2016 assessment); 2017. Available from:  
782 <https://www.iucnredlist.org/species/22705608/110431877>  
783
- 784 14. U.S. Fish and Wildlife Service [Internet]. Birds of Conservation Concern 2019. Falls Church,  
785 VA: US Dept of the Interior, Fish and Wildlife Service; 2019. Available from:  
786 <http://www.fws.gov/birds/management/managed-species/birds-of-conservation-concern.php>  
787
- 788 15. Somershoe, SG, Ammon E, Boone JD, Johnson K, Darr M, Witt C, et al. Conservation  
789 Strategy for the Pinyon Jay (*Gymnorhinus cyanocephalus*). Denver, CO: Partners in Flight  
790 Western Working Group and U. S. Fish and Wildlife Service; 2020. Available from:  
791 [https://partnersinflight.org/wp-content/uploads/2019/10/Conservation-Strategy-for-Pinyon-](https://partnersinflight.org/wp-content/uploads/2019/10/Conservation-Strategy-for-Pinyon-Jay_Version-1_February-2020_LowRes.pdf)  
792 [Jay\\_Version-1\\_February-2020\\_LowRes.pdf](https://partnersinflight.org/wp-content/uploads/2019/10/Conservation-Strategy-for-Pinyon-Jay_Version-1_February-2020_LowRes.pdf).  
793
- 794 16. Marzluff, JM, Balda RP. The advantages of, and constraint forcing, mate fidelity in pinyon  
795 jays. *Auk*.1988;105(2): 286-295.

796

797 17. Marzluff, JM, Balda RP. Resource and climatic variability: influences on sociality of two  
798 southwestern corvids. In: Slobodchikoff CN, editor. The ecology of social behavior. [Publication  
799 location unknown]: Academic Press; 1988. p 255-283.

800

801 18. Gottfried GJ, Severson KE. Managing pinyon-juniper woodlands. *Rangelands*. 1994;16:234-  
802 236.

803

804 19. Miller RF, Tausch RJ, McArthur ED, Johnson DD, Sanderson SC. Age structure and  
805 expansion of piñon-juniper woodlands: a regional perspective in the Intermountain West. Ft.  
806 Collins, CO: U.S. Department of Agriculture, Forest Service, Rocky Mountain Research Station;  
807 2008. RMRS-RP-69.

808

809 20. Morris LR, Rowe RJ. Historical land use and altered habitats in the Great Basin. *Journal of*  
810 *Mammalogy*. 2014;95:1144-1156.

811

812 21. Kramer DW, Sorensen GE, Taylor CA, Cox RD, Gipson PS, Cain III JW. Ungulate  
813 exclusion, conifer thinning, and mule deer forage in northeastern New Mexico. *Journal of Arid*  
814 *Environments*. 2015;113:29–34.

815

816 22. Miller RF, Chambers JC, Evers L, Williams CJ, Snyder KA, Roundy BA, et. al. The ecology,  
817 history, ecohydrology, and management of pinyon and juniper woodlands in the Great Basin and  
818 Northern Colorado Plateau of the Western United States. Fort Collins, CO: U. S. Department of



- 819 Agriculture, Forest Service, Rocky Mountain Research Station; 2019. Gen tech report. RMRS-  
820 GTR-403.  
821
- 822 23. Johnson K, Neville TB, Smith JW, Horner MW. Home range- and colony-scale habitat  
823 models for Pinyon Jays in piñon-juniper woodlands of New Mexico, USA. *Avian Conservation*  
824 *and Ecology*. 2016;11:6.  
825
- 826 24. Johnson K, Sadoti G, Smith J. Weather-induced declines in Piñon tree condition and  
827 response of a declining bird species. *Journal of Arid Environments*. 2017;146: 1-9.  
828
- 829 25. Goeking SA, Shaw JD, Witt C, Thompson MT, Werstak Jr. CE, Amacher, MC, et. al. New  
830 Mexico's forest resources, 2008-2012. Fort Collins, CO: U.S. Department of Agriculture, Forest  
831 Service, Rocky Mountain Research Station; 2014. Resource bull. RMRS-RB-18. 144 p.  
832
- 833 26. Menlove J, Shaw JD, Witt C, Werstak Jr CE, DeRose RJ, Goeking, SA, et. al. Nevada's  
834 forest resources, 2004-2013. Fort Collins, CO: U.S. Department of Agriculture, Forest Service,  
835 Rocky Mountain Research Station; 2016. Resource bull. RMRS-RB-22. 167 p.  
836
- 837 27. Werstak Jr. CE, Shaw JD, Goeking, SA, Witt C, Menlove J, Thompson MT, et. al. Utah's  
838 forest resources, 2003-2012. Fort Collins, CO: U.S. Department of Agriculture, Forest Service,  
839 Rocky Mountain Research Station; 2016. Resource bull. RMRS-RB-20. 159 p.  
840

- 841 28. Thompson MT, Shaw JD, Witt C, Werstak Jr. CE, Amacher MC, Goeking SA, et. al.  
842 Colorado's forest resources, 2004-2013. Fort Collins, CO: U.S. Department of Agriculture,  
843 Forest Service, Rocky Mountain Research Station; 2017. Resource bull. RMRS-RB-23. 136 p.  
844
- 845 29. Betancourt JL. Paleoecology of pinyon-juniper woodlands: summary. In: Everett RL, editor.  
846 Proceedings- Pinyon-juniper conference. USDA Forest Service; 1987. Gen tech report. INT-215.  
847 p 129-139.  
848
- 849 30. Thompson RS. Late Quaternary vegetation and climate in the Great Basin. In: Betancourt JL,  
850 et al., editors. Packrat middens: The last 40,000 years of biotic change. Tucson, AZ: University  
851 of Arizona Press; 1990. p. 200-239  
852
- 853 31. Cottom WP, Stewart G. Plant succession as a result of grazing and of meadow  
854 desiccation by erosion since settlement in 1862. *Journal of Forestry*. 1940;38: 613-626.  
855
- 856 32. Tausch RJ, West NE, Nabi AA. Tree age and dominance patterns in Great Basin pinyon-  
857 juniper woodlands. *Journal of Range Management*. 1981;34:259-264.  
858
- 859 33. Miller RF, Tausch RJ, MacArthur ED, Johnson DJ, Sanderson SC. Age structure and  
860 expansion of piñon-juniper woodlands: a regional perspective in the Intermountain West. Fort  
861 Collins, CO: U.S. Department of Agriculture, Forest Service, Rocky Mountain Research Station;  
862 2008. RMRS-RP-69.  
863

- 864 34. Morris LR, Rowe RJ. Historical land use and altered habitats in the Great Basin. *Journal of*  
865 *Mammalogy*. 2014;95: 1144-1156.
- 866
- 867 35. Young JA, Budy, JD. Historical use of Nevada's pinyon-juniper woodlands. *Forest and*  
868 *Conservation History*. 1979;23(3):112-121.
- 869
- 870 36. Ko DW, Sparrow AD, Weisberg PJ. Land-use legacy of historical tree harvesting for  
871 charcoal production in a semi-arid woodland. *Forest Ecology and Management* [Internet].  
872 2011;261(7):1238-1292. Available from: doi:10.1016/j.foreco.2011.01.007
- 873
- 874 37. Natural Resources Conservation Service. Sage Grouse Initiative; Success on the range.  
875 Washington D.C.: U.S. Department of Agriculture, Natural Resources Conservation Service;  
876 2015.
- 877
- 878 38. Chambers JC, Beck JL, Bradford JB, Bybee J, Campbell S, Carlson J, et al. Science  
879 framework for conservation and restoration of the sagebrush biome: Linking the Department of  
880 the Interior's Integrated Rangeland Fire Management Strategy to long-term strategic  
881 conservation actions. Part 1. Science basis and applications. Fort Collins, CO: U.S Department of  
882 Agriculture, Forest Service, Rocky Mountain Research Station; 2017. Gen tech rep. RMRS-  
883 GTR-360. 213 pp.
- 884

- 885 39. Baruch-Mordo S, Evans JS, Severson JP, Naugle DE, Maestas JD, Kiesecker JM, et al.  
886 Saving sage-grouse from the trees: A proactive solution to reducing a key threat to a candidate  
887 species. *Biological Conservation*. 2013;167:233–241.  
888
- 889 40. Donnelly JP, Tack JD, Doherty KE, Naugle DE, Allred BW, Dreitz VJ. Extending conifer  
890 removal and landscape protection strategies from sage-grouse to songbirds, a range-wide  
891 assessment. *Rangeland Ecology and Management*. 2017;70:95-105.  
892
- 893 41. Lewallen S, Courtright P. Epidemiology in practice: case-control studies. *Community Eye*  
894 *Health*. 1998;11:57-58.  
895
- 896 42. Keating KA, Cherry S. Use and interpretation of logistic regression in habitat-selection  
897 studies. *The Journal of Wildlife Management*. 2004;68:774-789.  
898
- 899 43. Soular CE. Central Basin and Range Ecoregion. In: Sleeter BM, Wilson TS, Acevedo W,  
900 editors. *Status and Trends of Land Change in the Western United States – 1973 – 2000*. U.S.  
901 Geological Survey; 2012. Professional Paper 1794-A. Available from:  
902 <https://pubs.usgs.gov/pp.1794/a/>  
903
- 904 44. Manly BF, McDonald L, Thomas D, McDonald TL, Erickson WP. *Resource Selection by*  
905 *Animals*. 2<sup>nd</sup> edition. New York: Springer; 2002.  
906

- 907 45. Cole KL, Arundel ST. Modeling the climatic requirements for southwestern plant species. In:  
908 Starratt S, Bloomquist N, editors. Proceedings of the Twenty-First Annual Pacific Climate  
909 Workshop. State of California Department of Water Resources [Internet]. 2007 [Cited 2020 Mar  
910 25]. Available from: <http://citeseerx.ist.psu.edu/viewdoc/summary?doi=10.1.1.606.6097>.
- 911
- 912 46. Gillespie AJR. Rationale for a National Annual Forest Inventory Program. *Journal of*  
913 *Forestry*. 1999;97(12): 16-20.
- 914
- 915 47. Smith WB. Forest Inventory and Analysis: A National Inventory and Monitoring Program.  
916 *Environmental Pollution*. 2002;116(1): S233-S242.
- 917
- 918 48. Zielinski WJ, Truex RL, Dunk JR, Gaman T. Using Forest Inventory data to assess fisher  
919 resting habitat suitability in California. *Ecological Applications*. 2006;16 (3):1010-1025.
- 920
- 921 49. Zarnetske PL, Edwards TC, Moisen GG. Modeling forest bird species' likelihood of  
922 occurrence in Utah with Forest Inventory and Analysis and Landfire map products and  
923 ecologically based pseudo-absence points. Proceedings of the Seventh Annual Forest Inventory  
924 and Analysis Symposium; 2005 Oct 3-4; Portland, Maine. Department of Agriculture, Forest  
925 Service; 2007. WO-GTR-77. p. 291-306
- 926
- 927 50. Witt C. Quantification of Lewis's Woodpecker habitat using Forest Inventory and Analysis  
928 data. Proceedings of 2008 Forest Inventory and Analysis Symposium; 2008 Oct 21-23; Park

- 929 City, Utah. United States Forest Service Rocky Mountain Research Station; 2009. RMRS-P-  
930 56CD.
- 931
- 932 51. Witt C. Characteristics of aspen infected with heartrot: Implications for cavity-nesting birds.  
933 Forest Ecology and Management. 2009;260 (6): 101-1016.
- 934
- 935 52. Witt C, Patterson PL. Big Sagebrush in Pinyon-juniper Woodlands: Using Forest Inventory  
936 and Analysis Data as a Management Tool for Quantifying and Monitoring Mule Deer Habitat.  
937 Natural Resources and Environmental Issues. 2011;16(27). Available from:  
938 <http://digitalcommons.usu.edu/nrei/vol16/iss1/27>
- 939
- 940 53. Bechtold WA, Patterson PL. The enhanced Forest Inventory and Analysis program-national  
941 sampling design and estimation procedures. Department of Agriculture Forest Service, Southern  
942 Research Station; 2005. SRS-GTR-80.
- 943
- 944 54. United States Department of Agriculture. Interior West Forest Inventory and Analysis field  
945 procedures version 6.1 [Internet]. Ogden, UT: United States Forest Service, Rocky Mountain  
946 Research Station; 2012. Available from: [https://www.fia.fs.fed.us/library/field-guides-methods-  
947 proc/docs/2014/Core%20FIA%20field%20guide\\_6-1.pdf](https://www.fia.fs.fed.us/library/field-guides-methods-proc/docs/2014/Core%20FIA%20field%20guide_6-1.pdf)
- 948
- 949 55. United States Department of Agriculture, Forest Service. Interior West Forest inventory and  
950 Analysis Region 4 All Condition Inventory Supplemental Field Guide [Internet]. Odgen, UT:  
951 United States Forest Service, Rocky Mountain Research Station; 2012. Available from:

952 [https://www.fs.fed.us/rm/ogden/datacollection/pdf/Region\\_4\\_All\\_Condition\\_Inventory\\_Supple](https://www.fs.fed.us/rm/ogden/datacollection/pdf/Region_4_All_Condition_Inventory_Supplemental_Field_Guide.pdf)  
953 [mental\\_Field\\_Guide.pdf](https://www.fs.fed.us/rm/ogden/datacollection/pdf/Region_4_All_Condition_Inventory_Supplemental_Field_Guide.pdf)

954

955 56. United States Department of Agriculture, Forest Service. Interior West Forest Inventory and  
956 Analysis field procedures version 4.0 [Internet]. Ogden, UT: United States Forest Service, Rocky  
957 Mountain Research Station; 2007. Available from: [https://www.fia.fs.fed.us/library/field-guides-](https://www.fia.fs.fed.us/library/field-guides-methods-proc/docs/core_ver_4-0_10_2007_p2.pdf)  
958 [methods-proc/docs/core\\_ver\\_4-0\\_10\\_2007\\_p2.pdf](https://www.fia.fs.fed.us/library/field-guides-methods-proc/docs/core_ver_4-0_10_2007_p2.pdf)

959

960 57. United States Department of Agriculture, Forest Service. Interior West Forest Inventory and  
961 Analysis field procedures version 5.0 [Internet]. Ogden, UT: United States Forest Service, Rocky  
962 Mountain Research Station; 2010. Available from: [https://www.fia.fs.fed.us/library/field-guides-](https://www.fia.fs.fed.us/library/field-guides-methods-proc/docs/Complete%20FG%20Document/NRS%20FG%205.0-Oct%202010-Complete%20Document.pdf)  
963 [methods-proc/docs/Complete%20FG%20Document/NRS%20FG%205.0-Oct%202010-](https://www.fia.fs.fed.us/library/field-guides-methods-proc/docs/Complete%20FG%20Document/NRS%20FG%205.0-Oct%202010-Complete%20Document.pdf)  
964 [Complete%20Document.pdf](https://www.fia.fs.fed.us/library/field-guides-methods-proc/docs/Complete%20FG%20Document/NRS%20FG%205.0-Oct%202010-Complete%20Document.pdf)

965

966 58. United States Department of Agriculture, Forest Service. Interior West Forest Inventory and  
967 Analysis field procedures version 5.1 [Internet]. Ogden, UT: United States Forest Service, Rocky  
968 Mountain Research Station; 2011. Available from: [https://www.fia.fs.fed.us/library/field-guides-](https://www.fia.fs.fed.us/library/field-guides-methods-proc/docs/Complete%20FG%20Document/core_ver_5-1_10_2011.pdf)  
969 [methods-proc/docs/Complete%20FG%20Document/core\\_ver\\_5-1\\_10\\_2011.pdf](https://www.fia.fs.fed.us/library/field-guides-methods-proc/docs/Complete%20FG%20Document/core_ver_5-1_10_2011.pdf)

970

971 59. Burrill EA, Wilson AM, Turner JA, Pugh SA, Menlove J, Christiansen G, et al. The Forest  
972 Inventory and Analysis Database: database description and user guide version 8.0 for Phase 2  
973 [Internet]. U.S. Department of Agriculture, Forest Service; 2018. 946 p. Available from:

974 <https://www.fia.fs.fed.us/library/database->

975 [documentation/current/ver80/FIADB%20User%20Guide%20P2\\_8-0.pdf](documentation/current/ver80/FIADB%20User%20Guide%20P2_8-0.pdf)

976

977 60. Alexander RR. Forest Vegetation in the Rocky Mountain and Intermountain Regions: Habitat  
978 Types and Community Types. Fort Collins, CO: U.S. Department of Agriculture, Forest Service,  
979 Rocky Mountain Forest and Range Experiment Station; 1988. Gen tech report. RM-162.

980

981 61. Kruskal JB. 1964. Multidimensional scaling by optimizing goodness-of-fit to a nonmetric  
982 hypothesis. Psychometrika. 1964;29: 1-28.

983

984 62. Kruskal JB. Nonmetric multidimensional scaling: a numerical method. Psychometrika.

985 1964;29:115-129.

986

987 63. Kruskal JB, Wish M. Multidimensional Scaling. Newbury Park, CA: Sage Publications;  
988 1978.

989

990 64. Oksanen J, Blanchet FG, Friendly M, Kindt R, Legendre P, McGlenn D, et al. Vegan:

991 community ecology package. R package version 2.5-5 [Internet]. 2019. Available from:

992 <https://CRAN.R-project.org/package=vegan>

993

994 65. R Core Team. R: A language and environment for statistical computing. Vienna, Austria: R

995 Foundation for Statistical Computing [Internet]. 2018. Available from: <https://www.R->

996 [project.org/](https://www.R-project.org/)



- 997
- 998 66. Newlon KR, Saab VA. Nest-site selection and nest survival of Lewis's Woodpecker in aspen  
999 riparian woodlands. *The Condor*. 2011;113:183-193.
- 1000
- 1001 67. Hosmer DW, Lemeshow S. Applied logistic regression. New York: Wiley; 1989.
- 1002
- 1003 68. Compton BW, Rhymer JM, McCollough M. Habitat selection by wood turtles (*Clemmys*  
1004 *insculpta*): an application of paired logistic regression. *Ecology*. 2002;83: 833-843.
- 1005
- 1006 69. Bates D, Maechler M, Bolker B, Walker S. Fitting linear mixed-effects models using lme4.  
1007 *Journal of Statistical Software*. 2004;67:1-48.
- 1008
- 1009 70. Genz A, Bretz F, Miwa T, Mi X, Leisch F, Scheipl F, et al. mvtnorm: multivariate normal  
1010 and t distributions. R package version 1.0-8 [Internet]. 2018. Available from: [http://CRAN.R-](http://CRAN.R-project.org/package=mvtnorm)  
1011 [project.org/package=mvtnorm](http://CRAN.R-project.org/package=mvtnorm)
- 1012
- 1013 71. Gotelli NJ, Ellison AM. A Primer of Ecological Statistics. Sunderland, MA: Sinaeur  
1014 Associates; 2004.
- 1015
- 1016 72. Drivas EP, Everett RL. Water relations characteristics of competing singleleaf pinyon  
1017 seedlings and sagebrush nurse plants. *Forest Ecology and Management*. 1988;23: 27-37.
- 1018
- 1019 73. Hollander JL, Vander Wall SB. Effectiveness of six species of rodents as

- 1020 dispersers of singleleaf piñon pine (*Pinus monophylla*). *Oecologia*. 2004;138: 57-65.
- 1021
- 1022 74. Vander Wall SB. Food Hoarding in Animals. Chicago, IL: University of Chicago Press;
- 1023 1990.
- 1024
- 1025 75. Evans RA. Management of pinyon-juniper woodlands. Ogden, UT: U. S. Department of
- 1026 Agriculture, Forest Service, Intermountain Research Station; 1988. Gen tech report. INT-249.
- 1027
- 1028 76. Meeuwig RO, Budy JD, Everett RL. *Pinus monophylla* Torr. & Frem., singleleaf pinyon. In:
- 1029 Burns RM, Honkala, technical coordinators. Silvicultures of Northern America, Volume 1:
- 1030 Conifers, Agricultural Handbook 654. Washington, D.C.: U. S. Department of Agriculture,
- 1031 Forest Service; 1990. p. 380-384
- 1032
- 1033 77. Wenninger EJ, Inouye RS. Insect community response to plant diversity and productivity in a
- 1034 sagebrush-steppe ecosystem. *Journal of Arid Environments*. 2008;72:24-33.
- 1035
- 1036 78. Johnson K, Sadoti G. Model transferability and implications for woodland management: a
- 1037 case study of Pinyon Jay nesting habitat. *Avian Conservation and Ecology* [Internet]. 2019;14(2)
- 1038 17. Available from: <http://www.ace-eco.org/vol14/iss2/art17/>
- 1039
- 1040 79. Tausch RJ, Tueller PT. Plant succession following chaining of pinyon-juniper woodlands in
- 1041 Eastern Nevada. *Journal of Range management*. 1977;30: 44-49.
- 1042

- 1043
- 1044 80. O'Meara TE, Haufler JB, Stelter LH, Nagy JG. Nongame wildlife response to chaining of  
1045 pinyon-juniper woodlands. *Journal of Wildlife Management*. 1981;45: 381-389.
- 1046
- 1047 81. Commons ML, Baydack RK, Braun CE. Sage grouse response to pinyon-juniper  
1048 management. *Proceedings of the conference on ecology and management of piñon–juniper*  
1049 *communities in the Interior West*; 1999; Ogden, UT. In: Monsen S, Stevens R comps. USDA  
1050 Forest Service. RMRS-P-9. p. 238-239
- 1051
- 1052 82. Johnson K, Petersen N, Smith J, Sadoti G. Piñon-juniper fuels reduction treatment impacts  
1053 Pinyon Jay nesting habitat. *Global Ecology and Conservation*. 2018;16:1-7.
- 1054
- 1055 83. Gabaldon DJ. Factors involved in nest site selection by Pinon Jays [Dissertation]. Flagstaff,  
1056 AZ: Northern Arizona University; 1979.
- 1057
- 1058 84. Mehringer PJ, Wigand PE. Comparison of late Holocene environments from woodrat  
1059 middens and pollen: Diamond Craters, Oregon. In: Betancourt JL, Van Devender TR, Martin PS,  
1060 editors. *Packrat Middens: The Last 40,000 Years of Biotic Change*. Tucson, AZ: University of  
1061 Arizona Press; 1990. p. 294-325
- 1062

- 1063 85. Miller RF, Wigand PE. Holocene changes in semiarid pinyon-juniper woodlands.  
1064 BioScience. 1994;44(7):465-474.  
1065
- 1066 86. Cole KL, Henderson N, Shafer DS. Holocene vegetation and historic grazing impacts at  
1067 Capitol Reef National Park reconstructed using packrat middens. Great Basin Naturalist.  
1068 1997;57(4): 315-326.  
1069
- 1070 87. Biondi F, Bradley M. Long-term survivorship of single-needle pinyon (*Pinus monophylla*) in  
1071 mixed-conifer ecosystems of the Great Basin, USA. Ecosphere. 2013;4(10): 1-19.  
1072
- 1073 88. Redmond MD, Forcella F, Barger NN. Declines in pinyon pine cone production associated  
1074 with regional warming. Ecosphere. 2012;3(12):120. Available from: DOI: 10.1890/ES12-  
1075 00306.1  
1076
- 1077 89. Ricca MA, Coates PS, Gustafson KB, Brussee BE, Chambers JC, Espinosa SP, Gardner SC,  
1078 Lisius SZ, Ziegler P, Delehanty DJ, Casazza ML. A conservation planning tool for Greater Sage-  
1079 Grouse using indices of species distribution, resilience, and resistance. Ecological Applications.  
1080 2018;28(4):878-896. Available from: DOI: 10.1002/eap.1690  
1081
- 1082 90. Chambers JC, Allen CR, Cushman SA. Operationalizing ecological resilience concepts for  
1083 managing species and ecosystems at risk. Frontiers in Ecology and Evolution. 2019;7:241.  
1084 Available from: DOI: 10.3389/fevo.2019.00241  
1085

1086

1087

## Supporting Information Captions

1088

1089 **S1 Table. All data used for data visualizations, ordinations, and logistic regression**  
1090 **analysis, as summarized in Table 2. Each record refers to either a behavior-specific Pinyon**  
1091 **Jay location or a control site. Each record includes various locational and data category**  
1092 **attributes, including decimal latitude and longitude, along with all habitat attributes**  
1093 **considered for inclusion in analysis, as described in Table 2. All attribute headers are**  
1094 **sufficiently explicit to be self-explanatory when viewed in conjunction with Table 2.**  
1095 **Definitions of codes for habitat types (which were not used in any analysis or data**  
1096 **visualization) are available in Alexander 1988 [60]. Missing data are intrinsic to the FIA**  
1097 **data set.**

1098



bioRxiv preprint doi: <https://doi.org/10.1101/2020.07.31.239367>; this version posted July 31, 2020. The copyright holder for this preprint (which was not certified by peer review) is the author/funder. This article is a US Government work. It is not subject to copyright under 17 USC 105 and is also made available for use under a CC0 license.

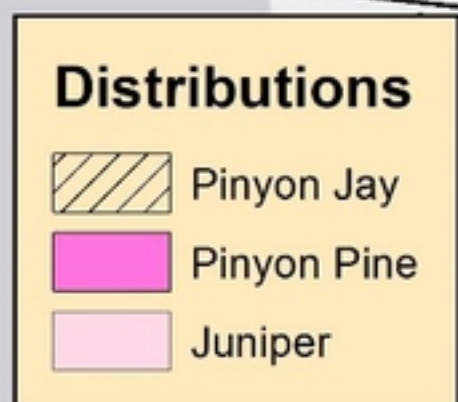

Esri, HERE, DeLorme, MapmyIndia, © OpenStreetMap contributors, and the GIS user community

Fig 1



bioRxiv preprint doi: <https://doi.org/10.1101/2020.07.31.230367>; this version posted July 31, 2020. The copyright holder for this preprint (which was not certified by peer review) is the author/funder. This article is a US Government work. It is not subject to copyright under 17 USC 105 and is also made available for use under a CC0 license.

**BCR 9**

**BCR 16**

Fig 2



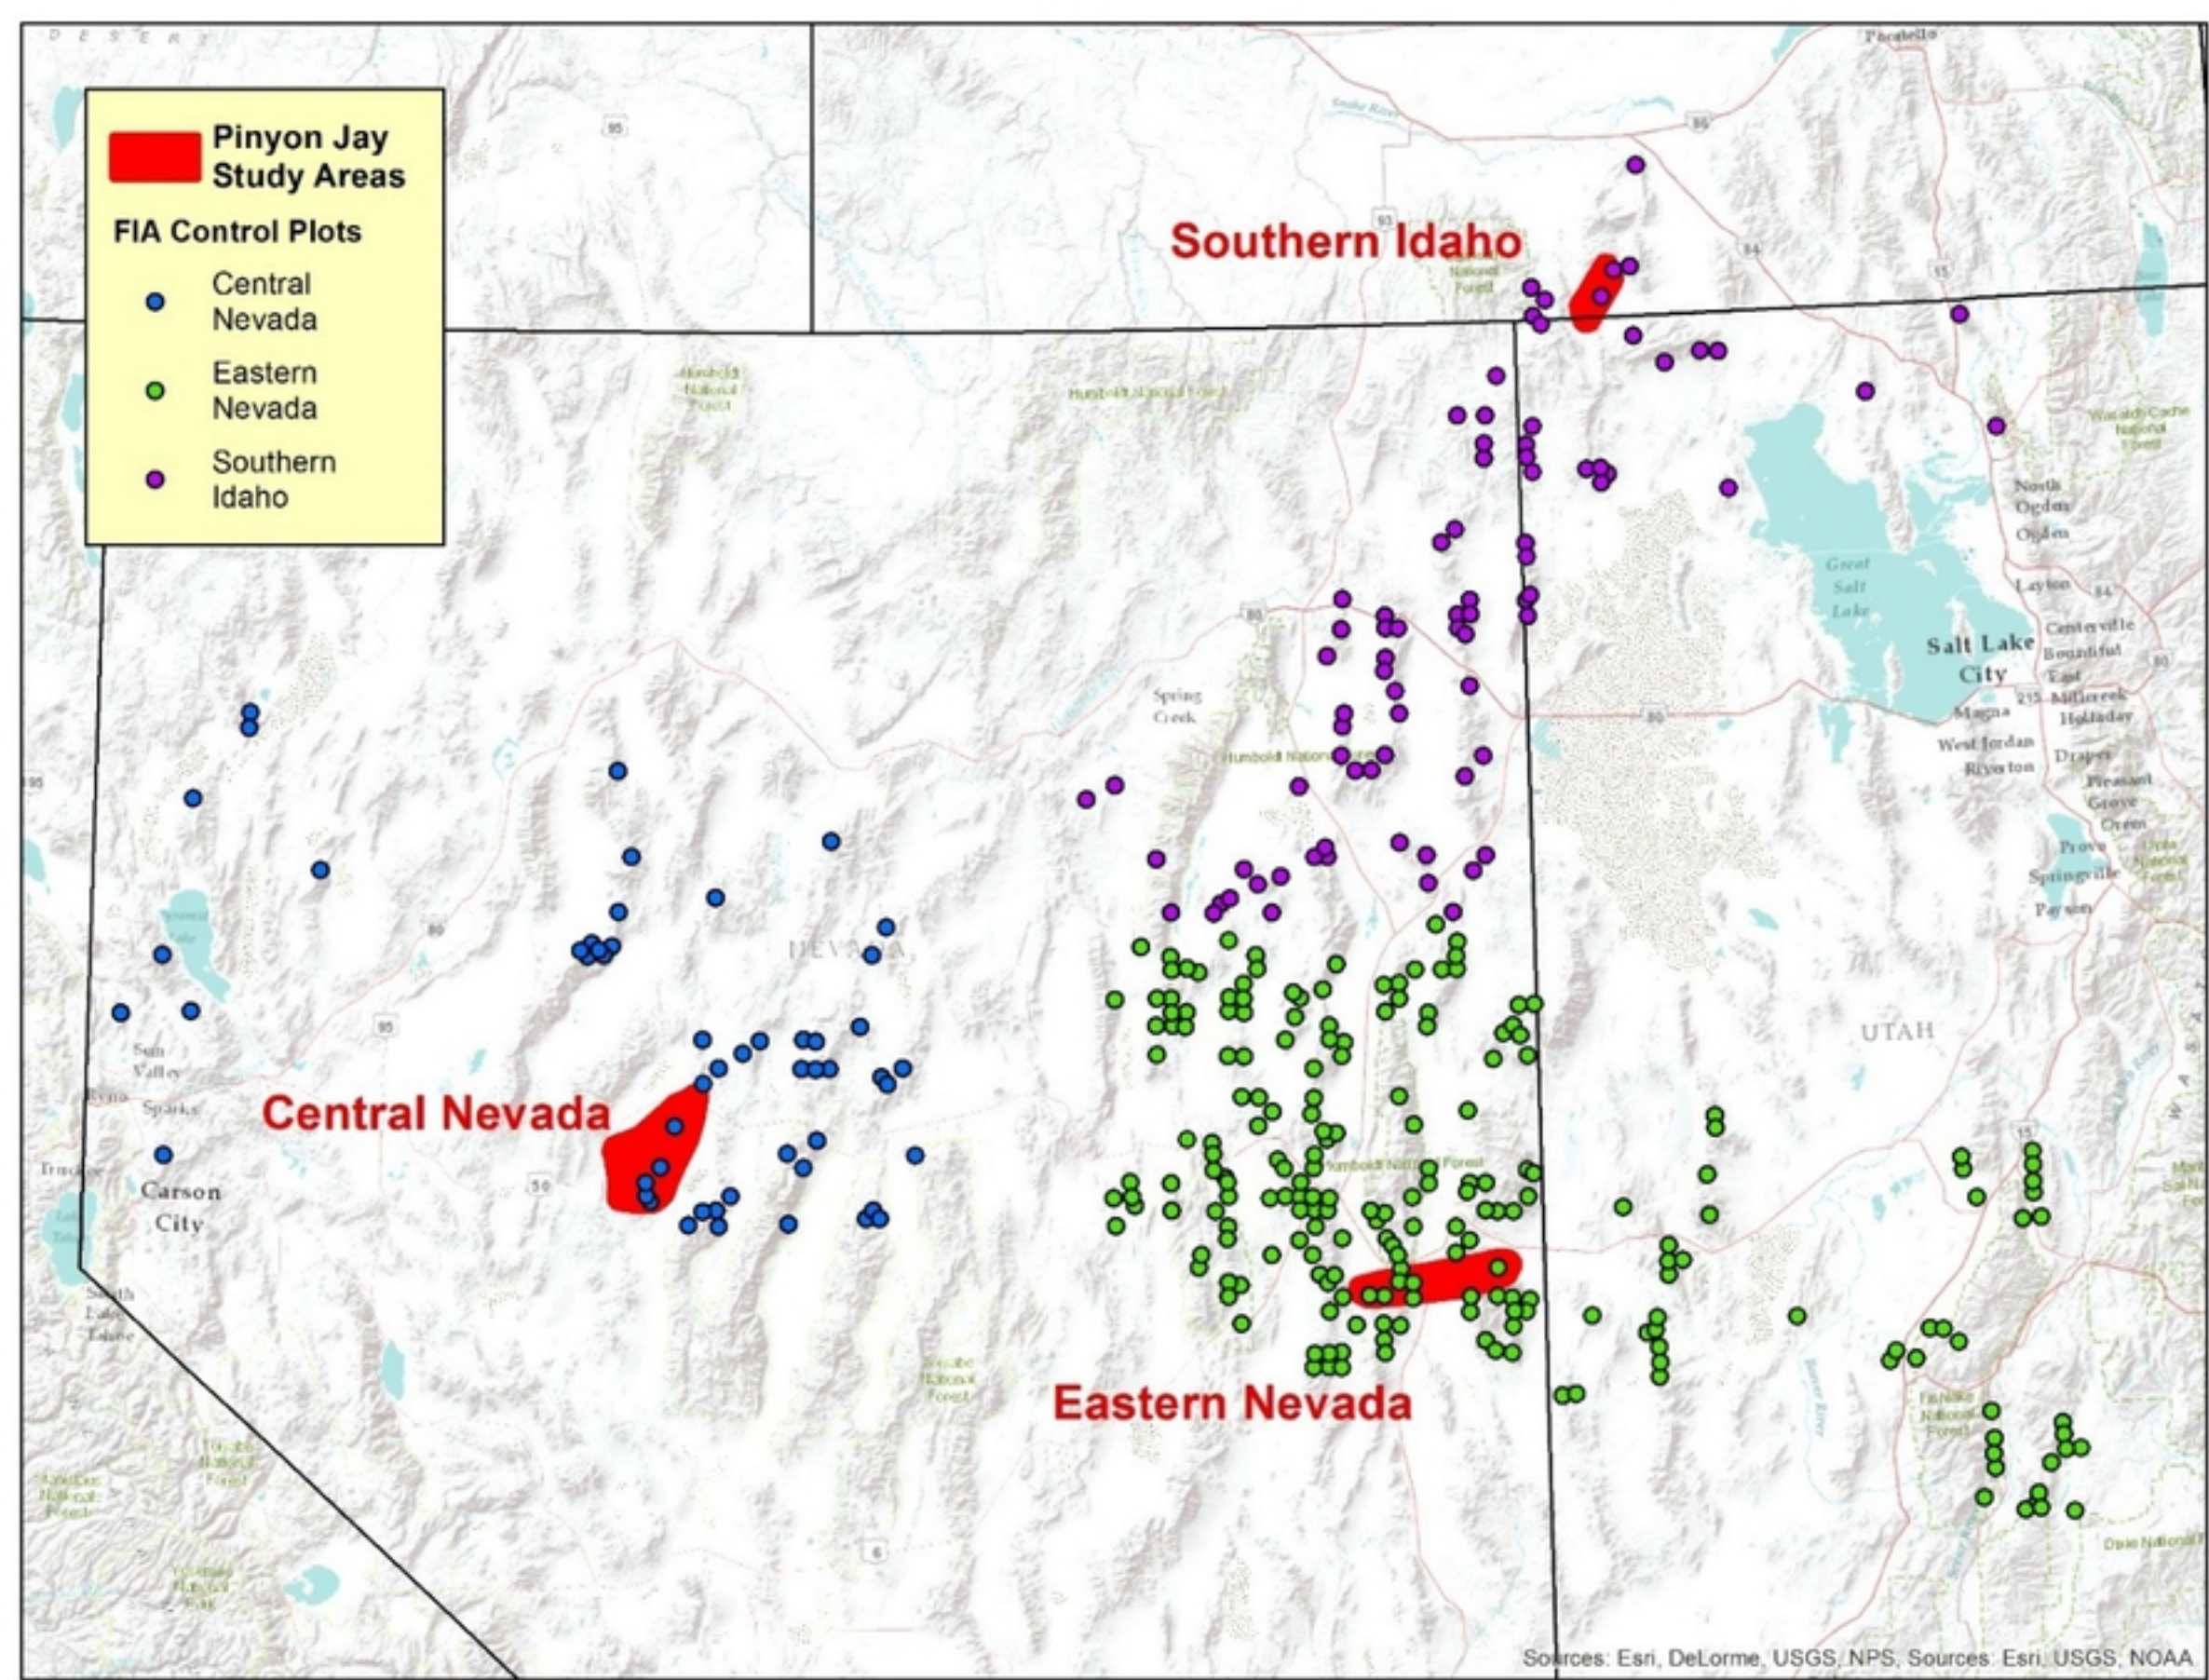

Fig 3



bioRxiv preprint doi: <https://doi.org/10.1101/2020.07.31.230367>; this version posted July 31, 2020. The copyright holder for this preprint (which was not certified by peer review) is the author/funder. This article is a US Government work. It is not subject to copyright under 17 USC 105 and is also made available for use under a CC0 license.

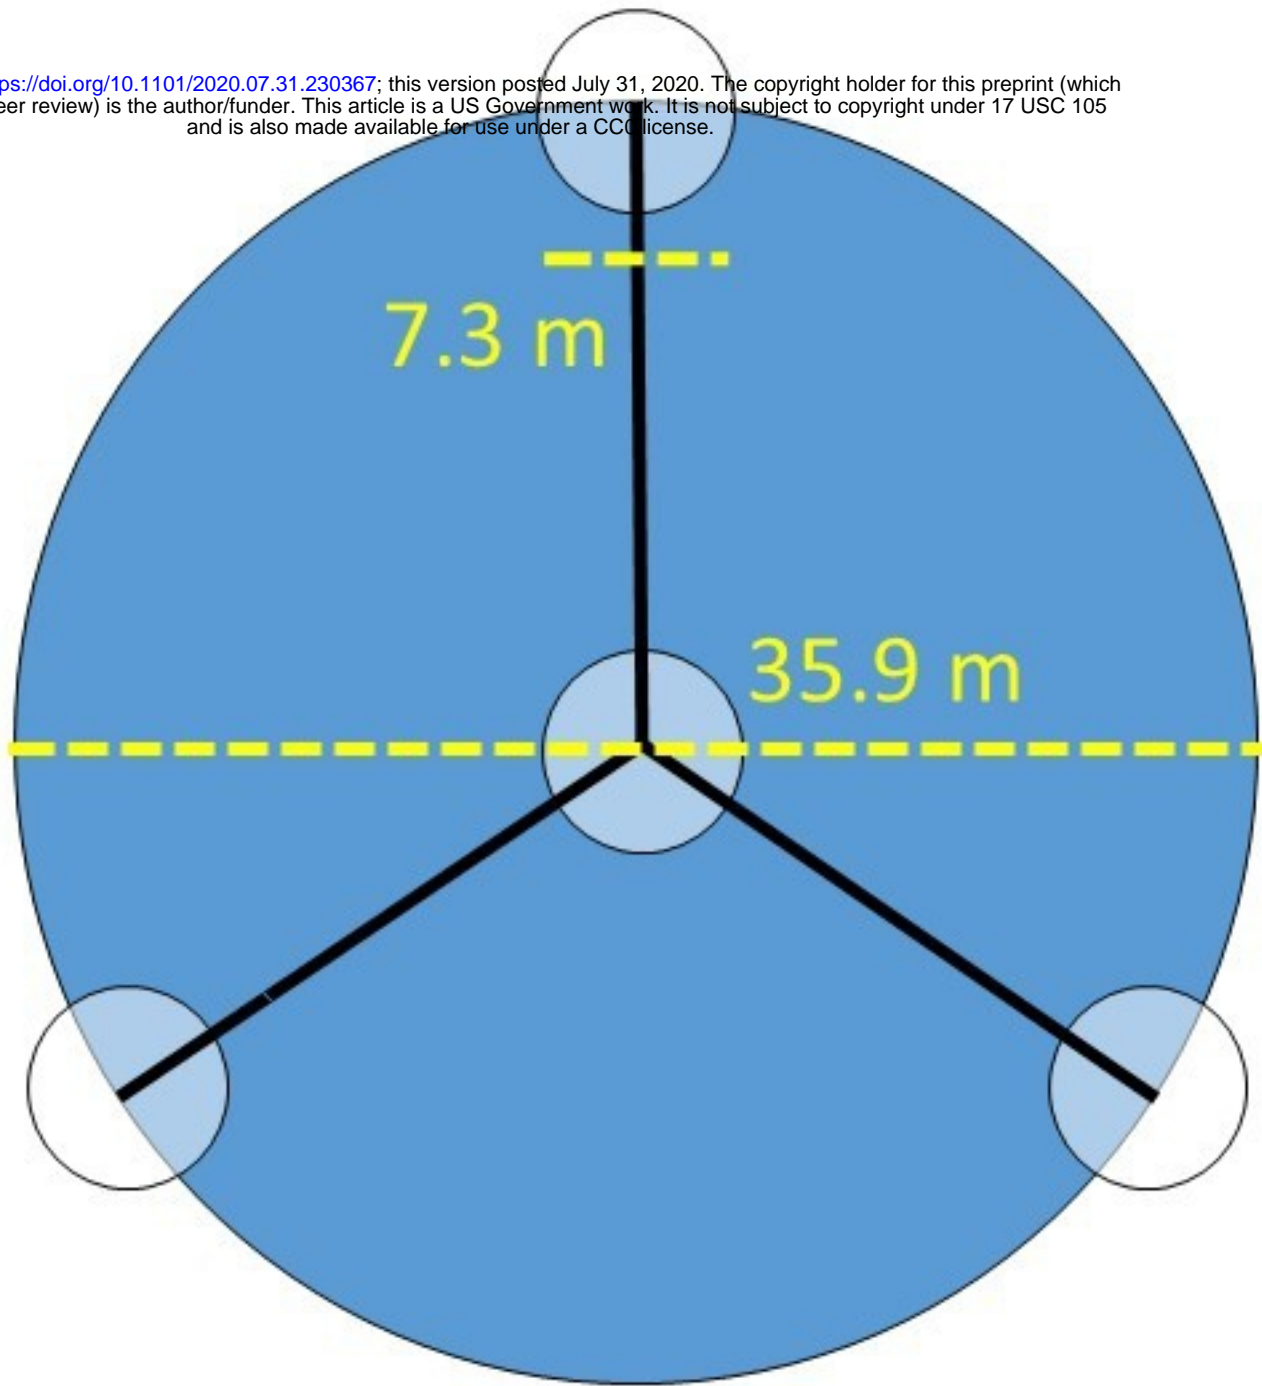

Fig 4

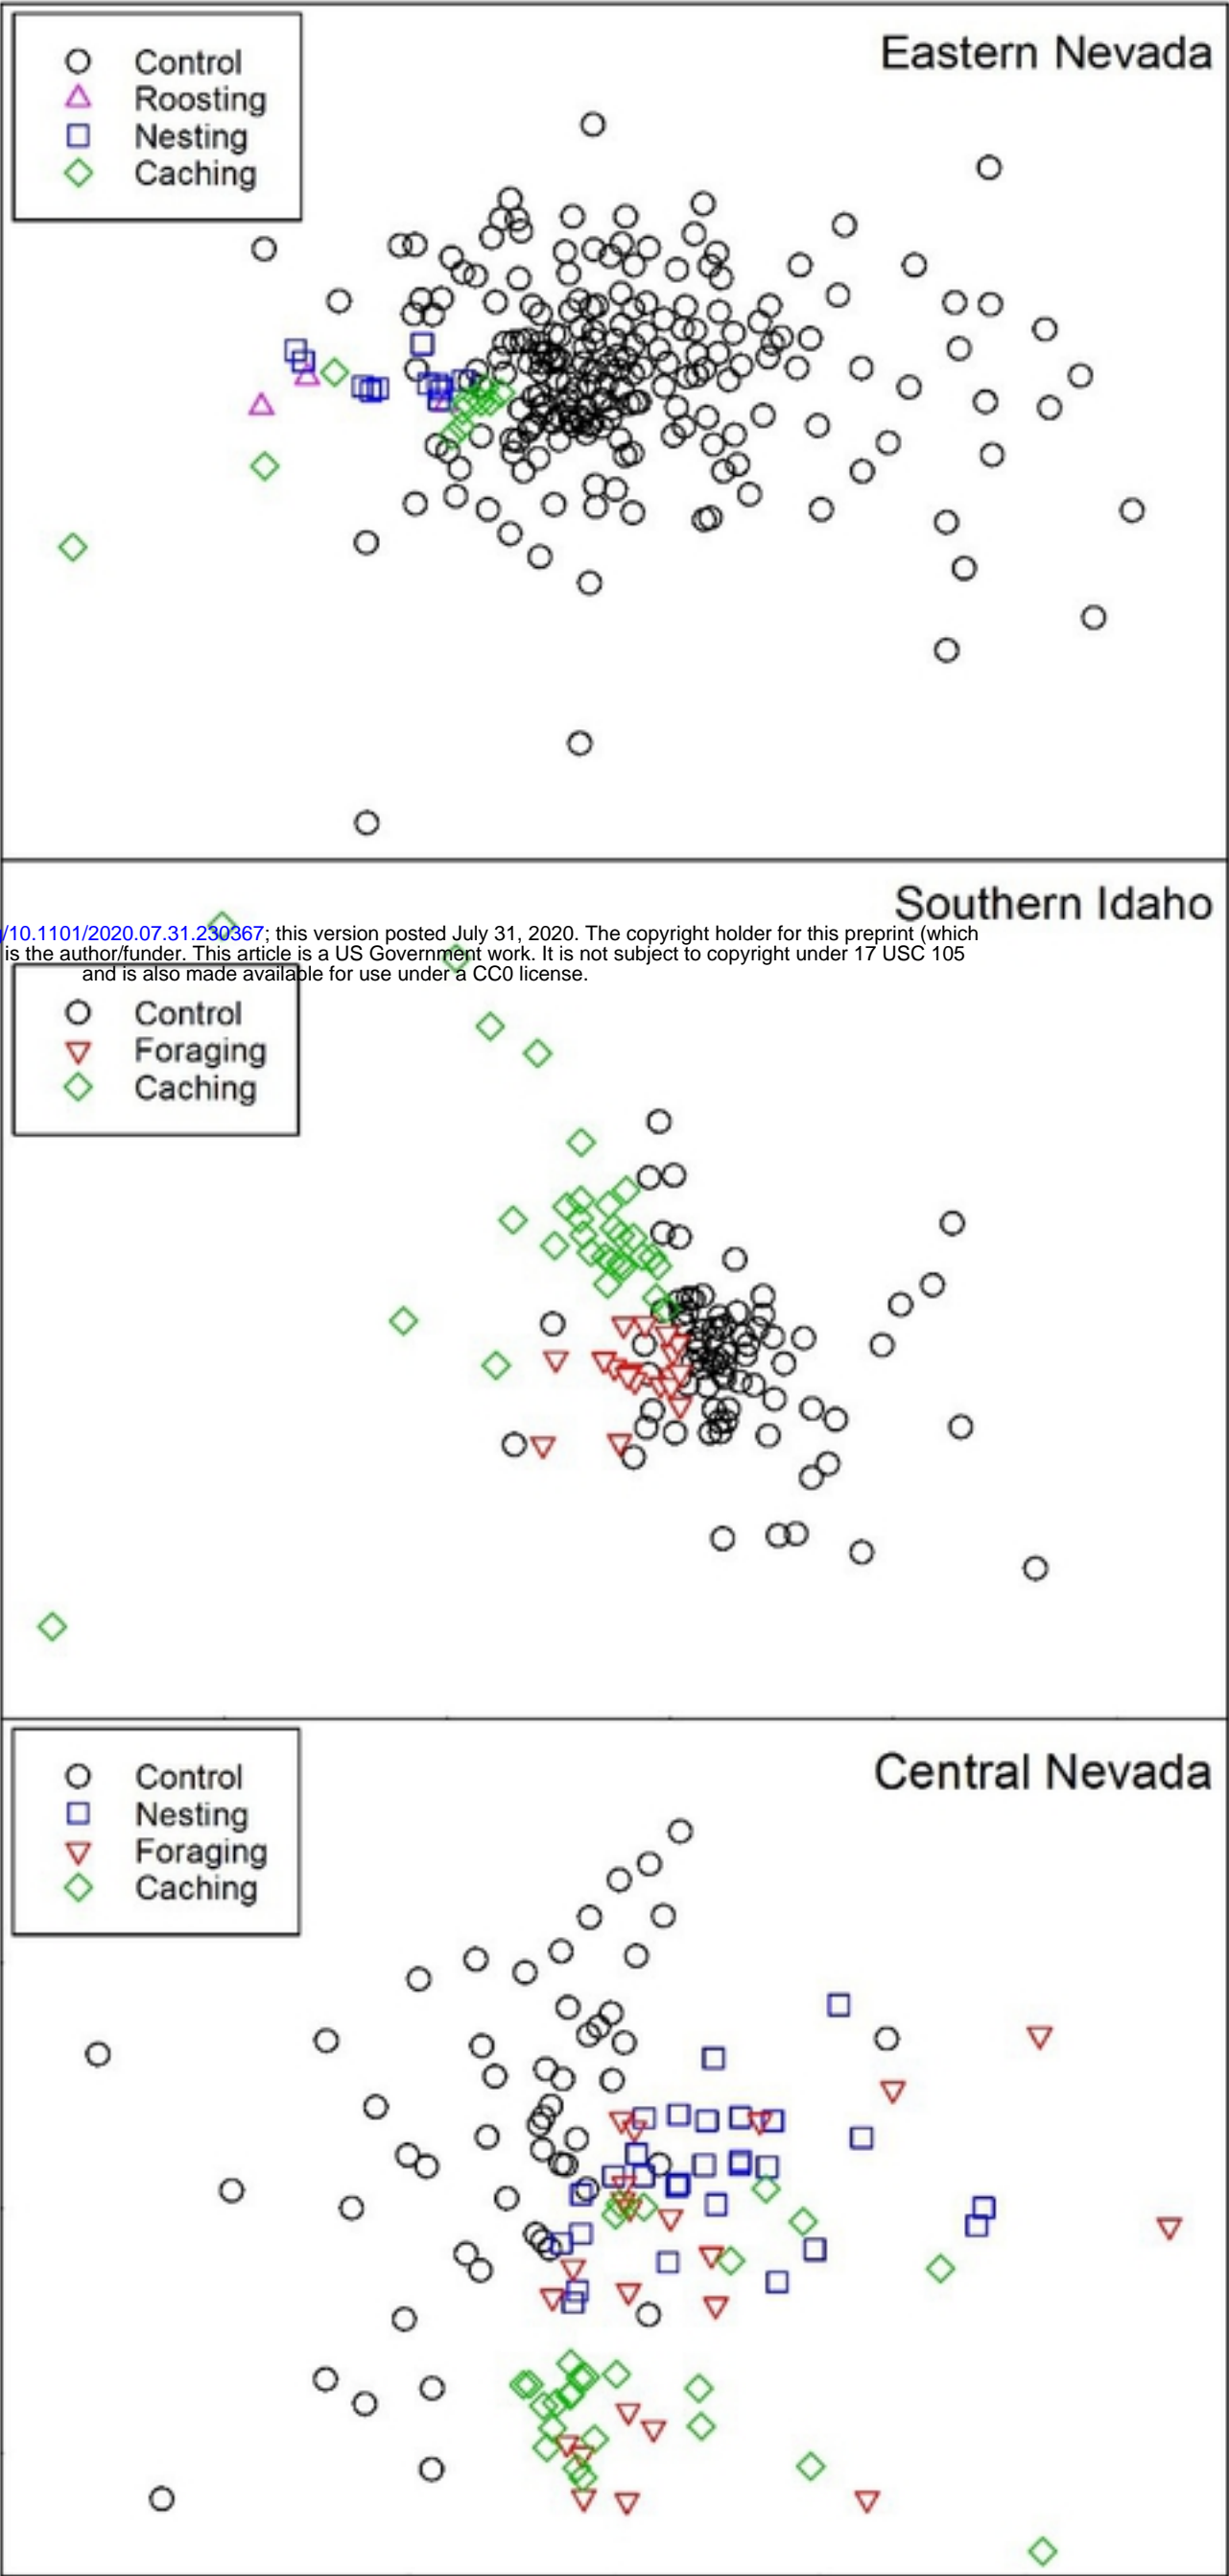

bioRxiv preprint doi: <https://doi.org/10.1101/2020.07.31.230367>; this version posted July 31, 2020. The copyright holder for this preprint (which was not certified by peer review) is the author/funder. This article is a US Government work. It is not subject to copyright under 17 USC 105 and is also made available for use under a CC0 license.

Fig 5

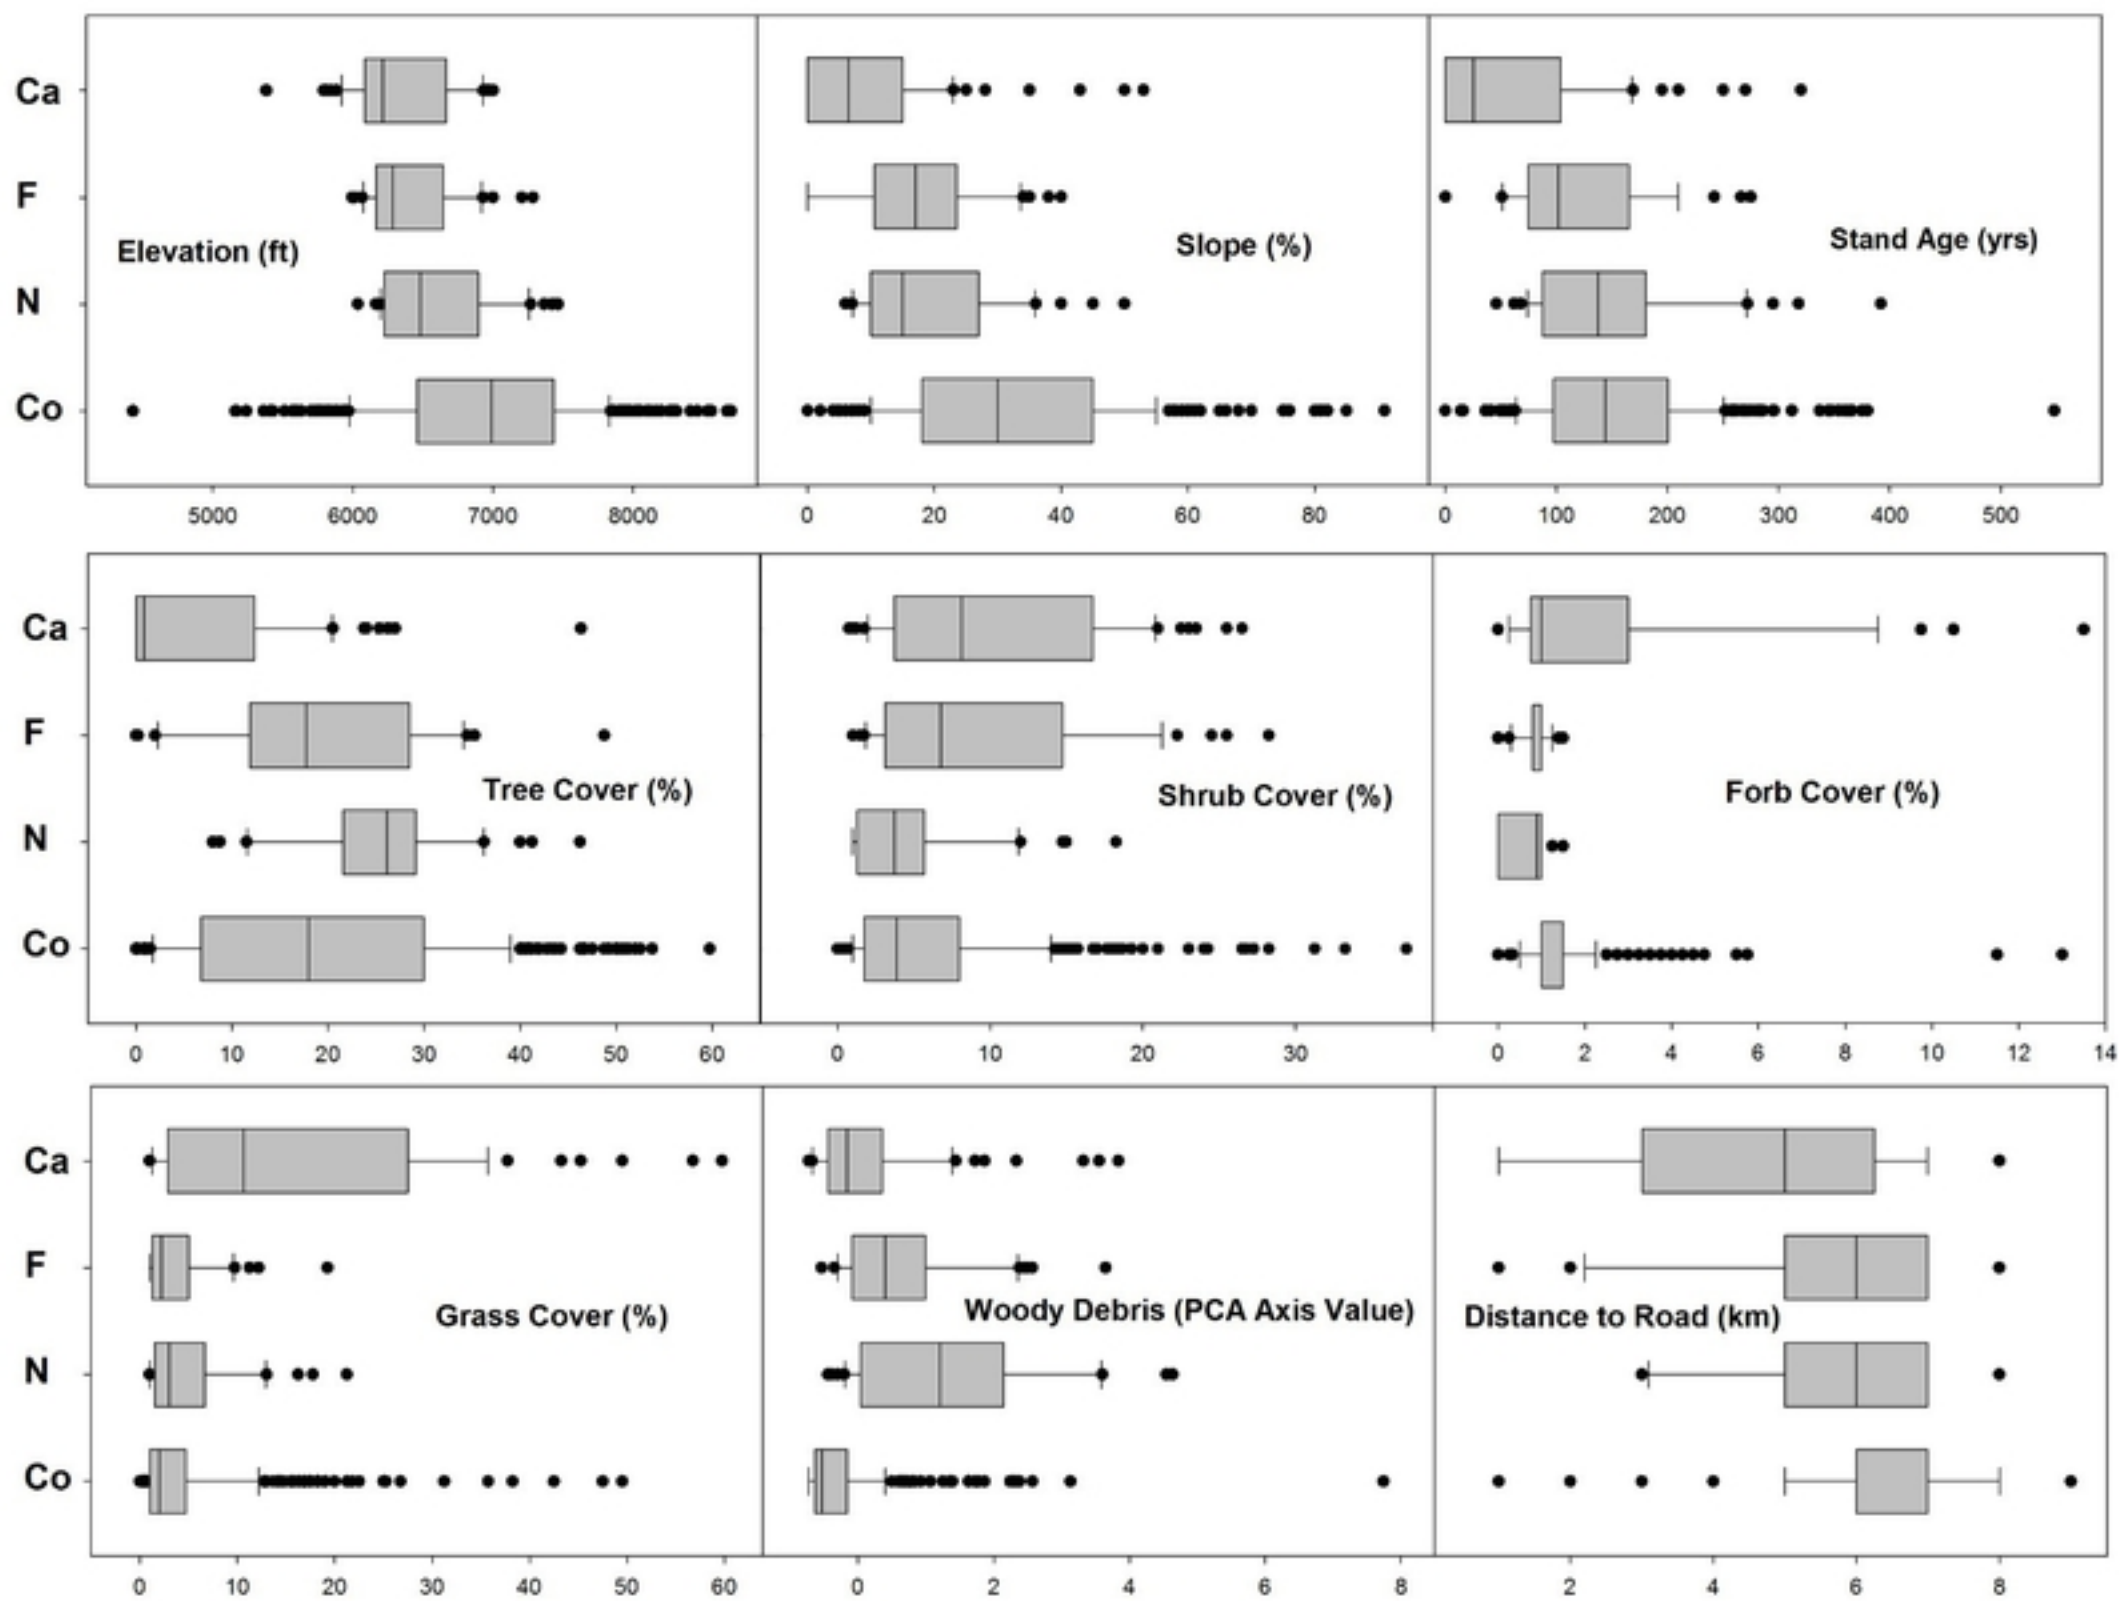

Fig 6

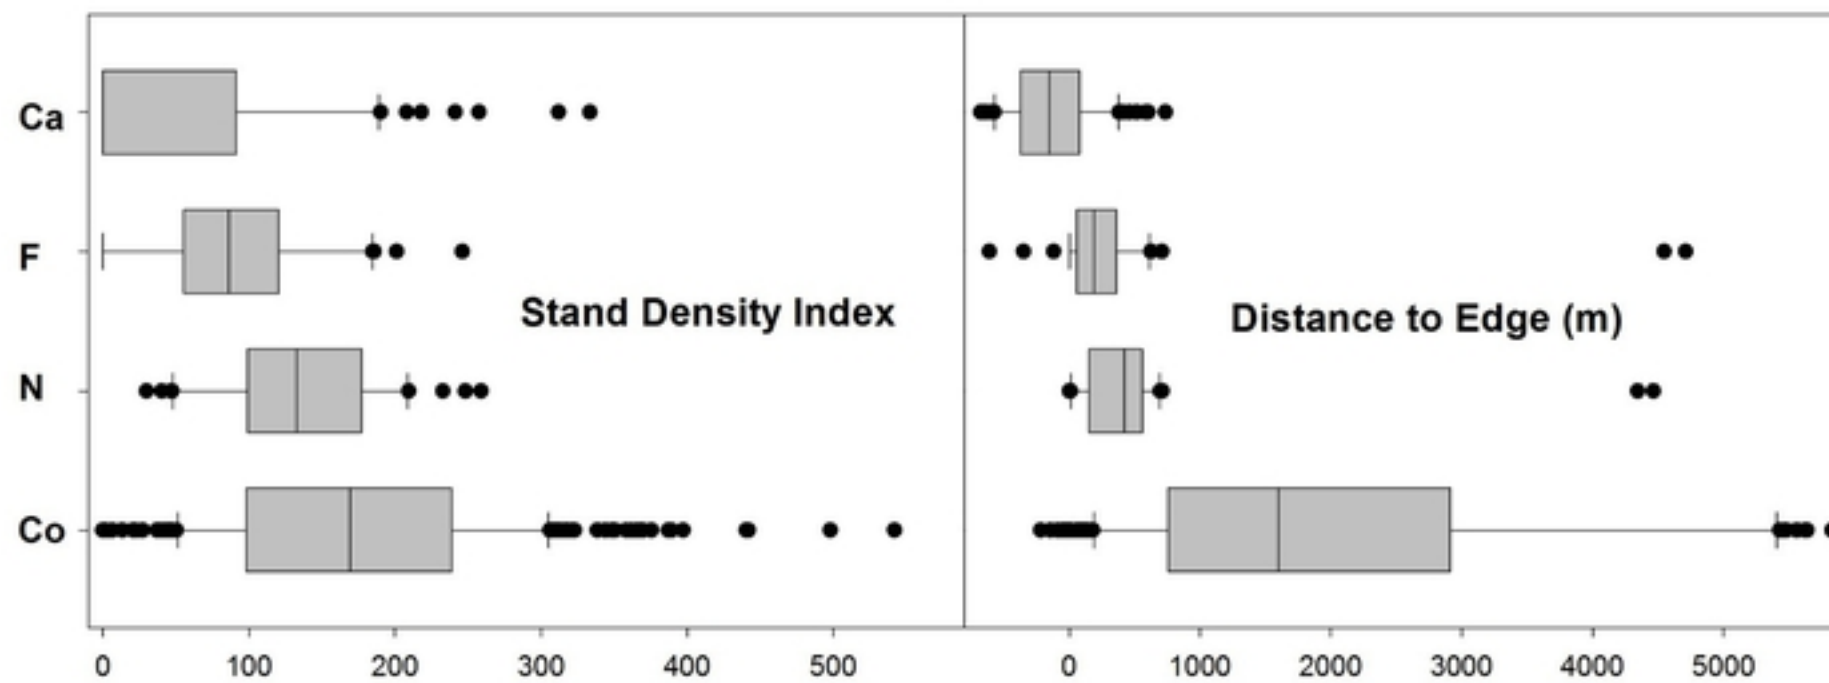

Fig 7
